# Supplementary material for: Host–guest cooperative bridged bicyclopolyynic (BBP) open-molecular cages with optical-switching properties
Source: Royal Society of Chemistry journal article supplement (doi:10.1039/d3me00141e), 2023-11-21
Supplement: d3me00141e1.pdf [file d3me00141e1.pdf]

## **ELECTRONIC SUPPLEMENTARY INFORMATION**

### **Host-guest cooperative bridged bicyclopolyynic (BBP) open-molecular cages with optical-switching properties**

**Akanksha Ashok Sangolkar, Rama Krishna Kadiyam, and Ravinder Pawar\***

*Laboratory of Advanced Computation and Theory for Materials and Chemistry, Department  
of Chemistry, National Institute of Technology Warangal (NITW), Warangal, Telangana-  
506004, India.*

*[ravinder\\_pawar@nitw.ac.in](mailto:ravinder_pawar@nitw.ac.in)*

| <b>CONTENTS</b> |                                                                                                                  |
|-----------------|------------------------------------------------------------------------------------------------------------------|
| <b>S1</b>       | <b>Optimized geometries and important geometrical parameters of the BBP cages in its electronic ground state</b> |
| <b>S2</b>       | <b>Frontiers molecular orbitals analysis, dipole moment, point group for the neutral and charged BBP cages</b>   |
| <b>S3</b>       | <b>MESP and NPA charges on BTH cage</b>                                                                          |
| <b>S4</b>       | <b>Photophysical properties of neutral and charged BBP cages</b>                                                 |
| <b>S5</b>       | <b>Optimized geometries of the complexes of BTH cage with guest (Li<sup>+</sup>, Li, Ne, Ar) atom/ion</b>        |
| <b>S6</b>       | <b>Frontiers molecular orbitals, energy gap, dipole moment, point group of the studied complexes</b>             |
| <b>S7</b>       | <b>MESP and NPA Charges on complexes</b>                                                                         |
| <b>S8</b>       | <b>IRC of the TS of the complex of Li with BTH cage</b>                                                          |
| <b>S9</b>       | <b>Energy decomposition analysis (EDA)</b>                                                                       |
| <b>S10</b>      | <b>Photophysical properties of the complexes</b>                                                                 |
| <b>S11</b>      | <b>AIMD Simulations</b>                                                                                          |
| <b>S12</b>      | <b>Cartesian coordinates</b>                                                                                     |

**S1. Optimized geometries and important geometrical parameters of the BBP cages in its electronic ground state**

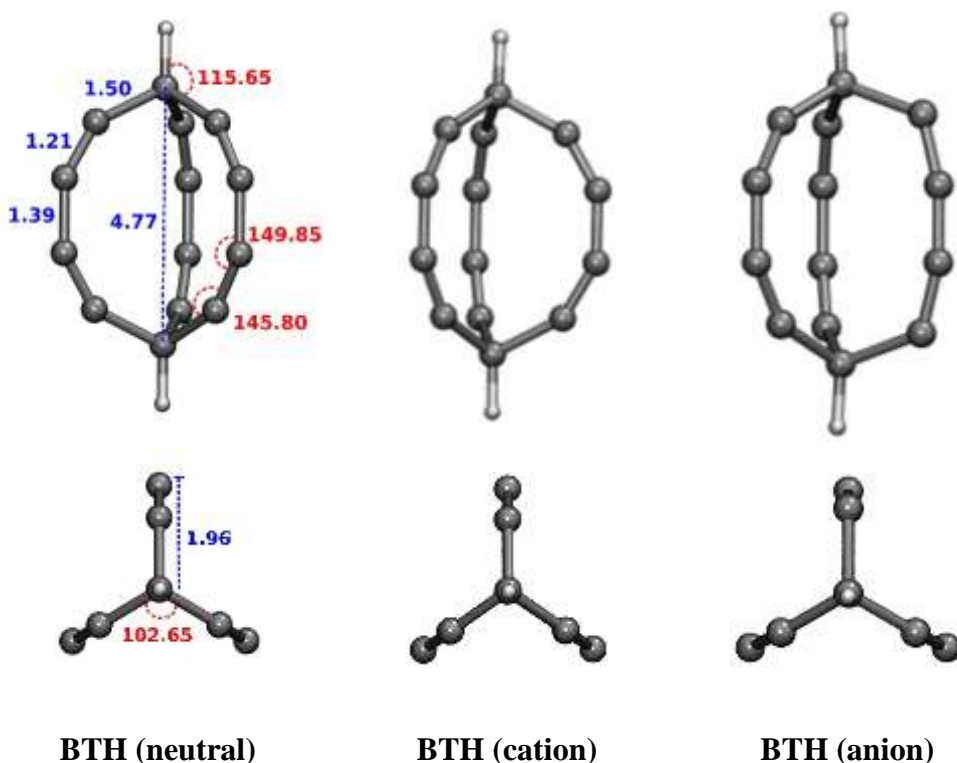

**Figure S1.** Side and top view of the optimized geometries of BTH cage in electronic ground state.

**Table S1.** Important geometrical parameters and deformation parameter (DP) in the optimized geometries of neutral and charged BTH cages.

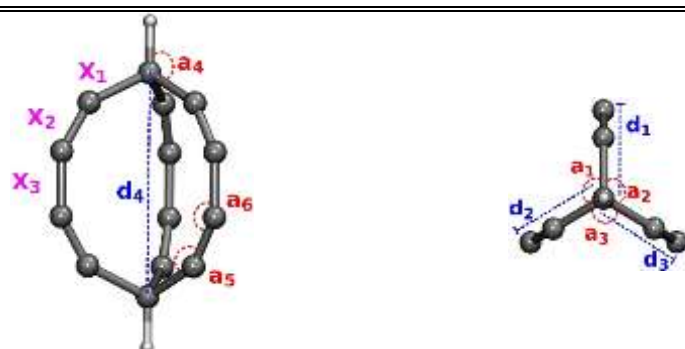

**Geometrical Parameters of Neutral BTH (C<sub>14</sub>H<sub>2</sub>) cage**

Arm1 = Arm2 =  
Arm3

|                 |                      |         |                      |         |
|-----------------|----------------------|---------|----------------------|---------|
| <b>Distance</b> | <b>d<sub>1</sub></b> | 1.958   | <b>x<sub>1</sub></b> | 1.499   |
|                 | <b>d<sub>2</sub></b> | 1.958   | <b>x<sub>2</sub></b> | 1.207   |
|                 | <b>d<sub>3</sub></b> | 1.958   | <b>x<sub>3</sub></b> | 1.386   |
|                 | <b>d<sub>4</sub></b> | 4.771   |                      |         |
| <b>Angle</b>    | <b>a<sub>1</sub></b> | 102.648 | <b>a<sub>4</sub></b> | 115.648 |
|                 | <b>a<sub>2</sub></b> | 102.648 | <b>a<sub>5</sub></b> | 145.798 |
|                 |                      |         |                      |         |

|                                                             | $a_3$ | 102.648 | $a_6$  | 149.851 |         |             |         |        |
|-------------------------------------------------------------|-------|---------|--------|---------|---------|-------------|---------|--------|
| Geometrical Parameters of Cationic BTH ( $C_{14}H_2$ ) cage |       |         |        |         |         |             |         |        |
|                                                             | DP    |         |        | Arm1    |         | Arm2 = Arm3 |         | DP     |
| Distance                                                    | $d_1$ | 1.963   | 0.005  | $x_1$   | 1.492   | -0.007      | 1.492   | -0.007 |
|                                                             | $d_2$ | 1.901   | -0.057 | $x_2$   | 1.207   | 0.000       | 1.221   | 0.014  |
|                                                             | $d_3$ | 1.901   | -0.057 | $x_3$   | 1.384   | -0.002      | 1.357   | -0.029 |
|                                                             | $d_4$ | 4.861   | 0.090  |         |         |             |         |        |
| Angle                                                       | $a_1$ | 103.599 | 0.951  | $a_4$   | 118.427 | 2.779       | 117.067 | 1.419  |
|                                                             | $a_2$ | 103.599 | 0.951  | $a_5$   | 145.178 | -0.620      | 148.295 | 2.497  |
|                                                             | $a_3$ | 93.334  | -9.314 | $a_6$   | 151.739 | 1.888       | 149.636 | -0.215 |

| Geometrical Parameters of Anionic BTH ( $C_{14}H_2$ ) cage |       |         |        |       |         |             |         |        |
|------------------------------------------------------------|-------|---------|--------|-------|---------|-------------|---------|--------|
|                                                            | DP    |         |        | Arm1  |         | Arm2 = Arm3 |         | DP     |
| Distance                                                   | $d_1$ | 1.777   | -0.181 | $x_1$ | 1.555   | 0.056       | 1.496   | -0.003 |
|                                                            | $d_2$ | 1.927   | -0.031 | $x_2$ | 1.254   | 0.047       | 1.212   | 0.005  |
|                                                            | $d_3$ | 1.927   | -0.031 | $x_3$ | 1.335   | -0.051      | 1.381   | -0.005 |
|                                                            | $d_4$ | 4.816   | 0.045  |       |         |             |         |        |
| Angle                                                      | $a_1$ | 106.126 | 3.478  | $a_4$ | 112.715 | -2.933      | 114.545 | -1.103 |
|                                                            | $a_2$ | 106.126 | 3.478  | $a_5$ | 123.551 | -22.247     | 145.142 | -0.656 |
|                                                            | $a_3$ | 101.747 | -0.901 | $a_6$ | 166.110 | 16.259      | 150.861 | 1.010  |

\* All the distances are given in Å and angles are in ° (degree)

**Table S2.** Important geometrical parameters and deformation parameter (DP) in the optimized geometries of neutral and charged BIN cages.

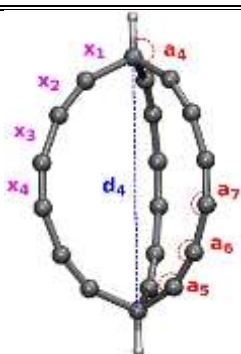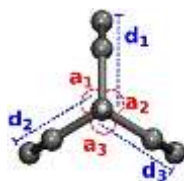

| Geometrical Parameters of Neutral BIN ( $C_{20}H_2$ ) cage |               |         |  |       |         |  |
|------------------------------------------------------------|---------------|---------|--|-------|---------|--|
|                                                            | Arm1 = Arm2 = |         |  | Arm3  |         |  |
| Distance                                                   | $d_1$         | 2.620   |  | $x_1$ | 1.486   |  |
|                                                            | $d_2$         | 2.620   |  | $x_2$ | 1.206   |  |
|                                                            | $d_3$         | 2.620   |  | $x_3$ | 1.372   |  |
|                                                            | $d_4$         | 6.847   |  | $x_4$ | 1.211   |  |
| Angle                                                      | $a_1$         | 104.083 |  | $a_4$ | 114.435 |  |
|                                                            | $a_2$         | 104.083 |  | $a_5$ | 154.481 |  |
|                                                            | $a_3$         | 104.083 |  | $a_6$ | 160.948 |  |
|                                                            |               |         |  | $a_7$ | 159.006 |  |

| Geometrical Parameters of Cationic BIN (C <sub>20</sub> H <sub>2</sub> ) cage |                      |         |        |                      |         |             |         |        |
|-------------------------------------------------------------------------------|----------------------|---------|--------|----------------------|---------|-------------|---------|--------|
|                                                                               |                      | DP      |        |                      | Arm1    | Arm2 = Arm3 |         |        |
|                                                                               |                      |         |        |                      | DP      |             |         | DP     |
| Distance                                                                      | <b>d<sub>1</sub></b> | 2.624   | 0.004  | <b>x<sub>1</sub></b> | 1.481   | -0.005      | 1.481   | -0.005 |
|                                                                               | <b>d<sub>2</sub></b> | 2.519   | -0.101 | <b>x<sub>2</sub></b> | 1.206   | 0.000       | 1.216   | 0.010  |
|                                                                               | <b>d<sub>3</sub></b> | 2.519   | -0.101 | <b>x<sub>3</sub></b> | 1.371   | -0.001      | 1.348   | -0.024 |
|                                                                               | <b>d<sub>4</sub></b> | 6.957   | 0.110  | <b>x<sub>4</sub></b> | 1.210   | -0.001      | 1.223   | 0.012  |
| Angle                                                                         | <b>a<sub>1</sub></b> | 105.047 | 0.964  | <b>a<sub>4</sub></b> | 116.737 | 2.302       | 115.705 | 1.270  |
|                                                                               | <b>a<sub>2</sub></b> | 105.047 | 0.964  | <b>a<sub>5</sub></b> | 153.070 | -1.411      | 155.633 | 1.152  |
|                                                                               | <b>a<sub>3</sub></b> | 96.040  | -8.043 | <b>a<sub>6</sub></b> | 162.670 | 1.722       | 161.027 | 0.079  |
|                                                                               |                      |         |        | <b>a<sub>7</sub></b> | 159.638 | 0.632       | 159.791 | 0.785  |

| Geometrical Parameters of Anionic BIN (C <sub>20</sub> H <sub>2</sub> ) cage |                      |         |        |                      |         |             |         |        |
|------------------------------------------------------------------------------|----------------------|---------|--------|----------------------|---------|-------------|---------|--------|
|                                                                              |                      | DP      |        |                      | Arm1    | Arm2 = Arm3 |         |        |
|                                                                              |                      |         |        |                      | DP      |             |         | DP     |
| Distance                                                                     | <b>d<sub>1</sub></b> | 2.232   | -0.388 | <b>x<sub>1</sub></b> | 1.533   | 0.047       | 1.481   | -0.005 |
|                                                                              | <b>d<sub>2</sub></b> | 2.543   | -0.077 | <b>x<sub>2</sub></b> | 1.25    | 0.044       | 1.209   | 0.003  |
|                                                                              | <b>d<sub>3</sub></b> | 2.543   | -0.077 | <b>x<sub>3</sub></b> | 1.328   | -0.044      | 1.37    | -0.002 |
|                                                                              | <b>d<sub>4</sub></b> | 7.015   | 0.168  | <b>x<sub>4</sub></b> | 1.246   | 0.035       | 1.213   | 0.002  |
| Angle                                                                        | <b>a<sub>1</sub></b> | 106.605 | 2.522  | <b>a<sub>4</sub></b> | 113.053 | -1.382      | 113.51  | -0.925 |
|                                                                              | <b>a<sub>2</sub></b> | 106.605 | 2.522  | <b>a<sub>5</sub></b> | 126.886 | -27.595     | 155.928 | 1.447  |
|                                                                              | <b>a<sub>3</sub></b> | 102.725 | -1.358 | <b>a<sub>6</sub></b> | 173.058 | 12.110      | 160.694 | -0.254 |
|                                                                              |                      |         |        | <b>a<sub>7</sub></b> | 166.188 | 7.182       | 160.264 | 1.258  |

\* All the distances are given in Å and angles are in ° (degree)

## S2. Frontiers molecular orbitals analysis, dipole moment, point group for the neutral and charged BBP cages

**Table S3.** The calculated dipole moment, point group, and energy gap values between the HOMO and LUMO in neutral and charged BBP cages.

| Systems                         | Dipole Moment<br>(Debye) | Point<br>Group        | Energy gap (eV)     |                    |
|---------------------------------|--------------------------|-----------------------|---------------------|--------------------|
|                                 |                          |                       | $\alpha$ spin state | $\beta$ spin state |
| <b>C<sub>14</sub> (Neutral)</b> | 0.000                    | <i>D<sub>3h</sub></i> | 6.03                | --                 |
| <b>C<sub>14</sub> (Cation)</b>  | 1.538                    | <i>C<sub>2v</sub></i> | 5.90                | 3.33               |
| <b>C<sub>14</sub> (Anion)</b>   | 3.107                    | <i>C<sub>2v</sub></i> | 3.98                | 5.00               |
| <b>C<sub>20</sub> (Neutral)</b> | 0.000                    | <i>D<sub>3h</sub></i> | 5.94                | --                 |
| <b>C<sub>20</sub> (Cation)</b>  | 2.185                    | <i>C<sub>2v</sub></i> | 5.44                | 2.59               |
| <b>C<sub>20</sub> (Anion)</b>   | 3.843                    | <i>C<sub>2v</sub></i> | 3.46                | 4.88               |

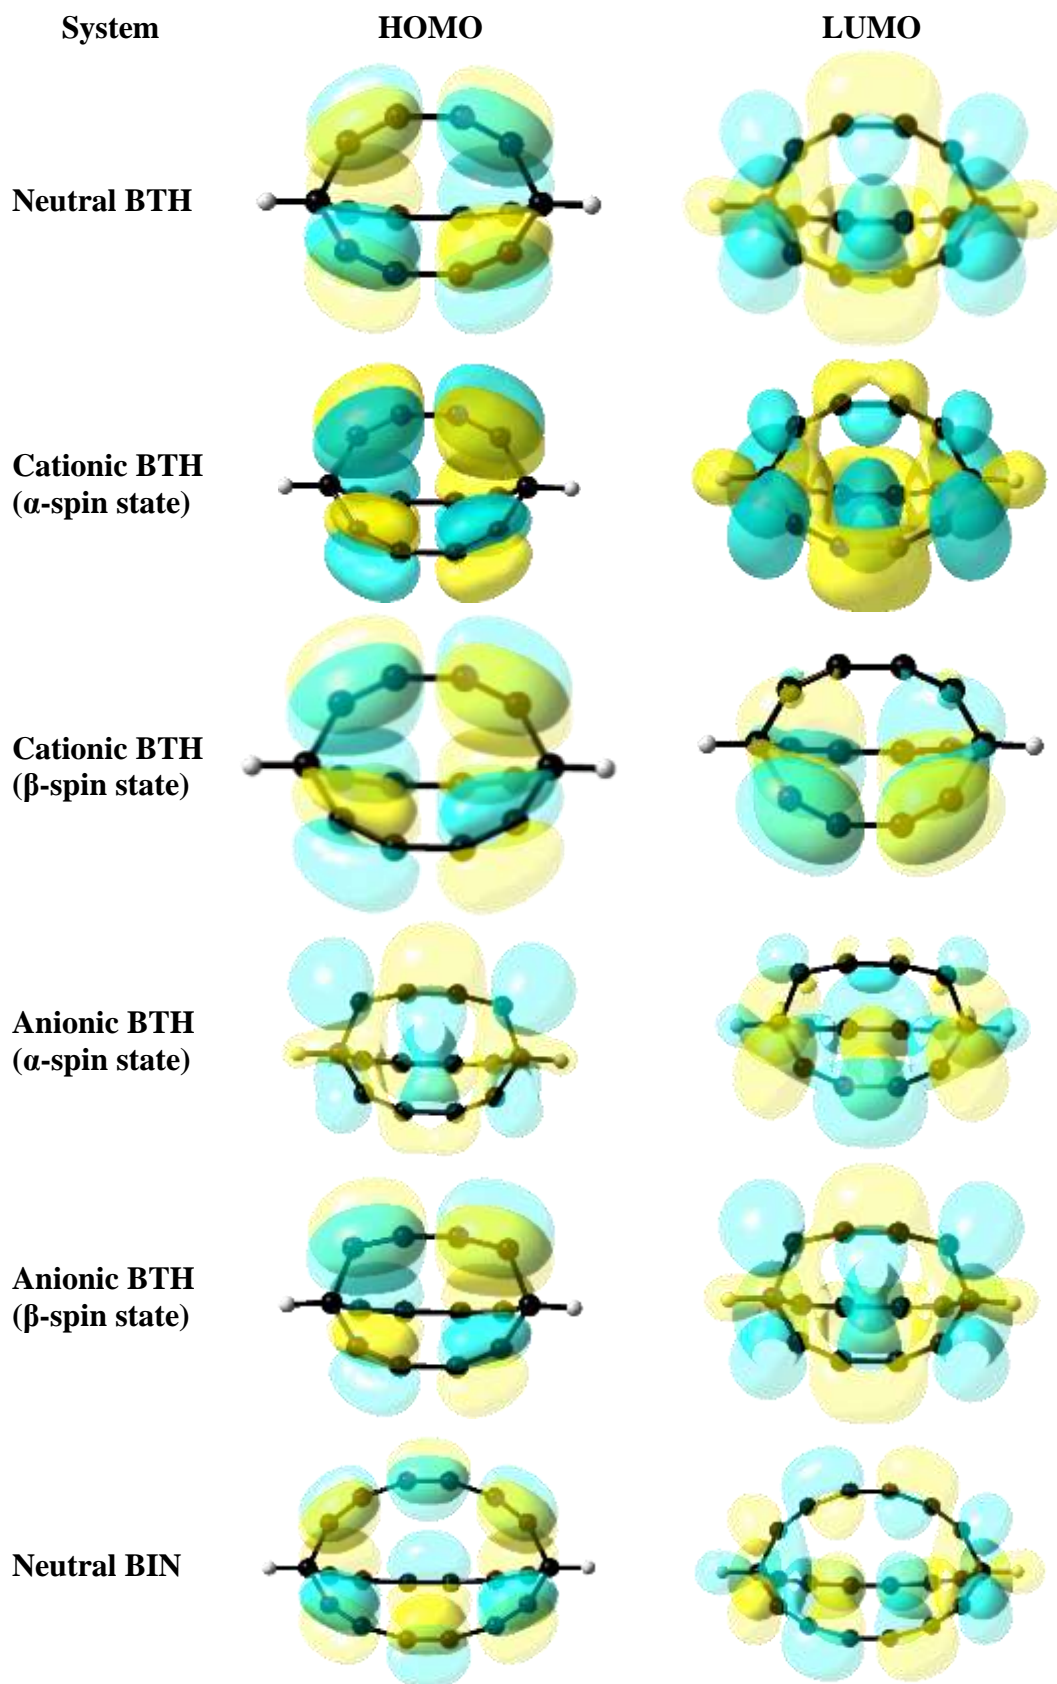

**Cationic BIN**  
( $\alpha$ -spin state)

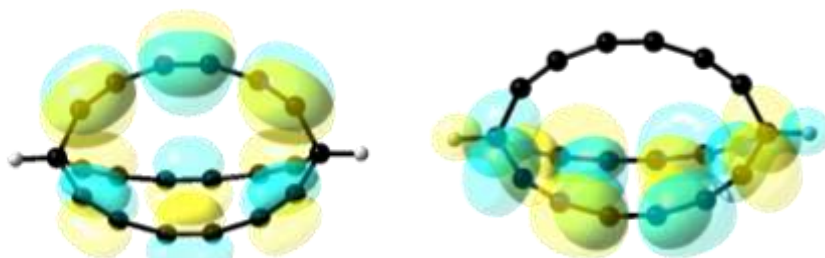

**Cationic BIN**  
( $\beta$ -spin state)

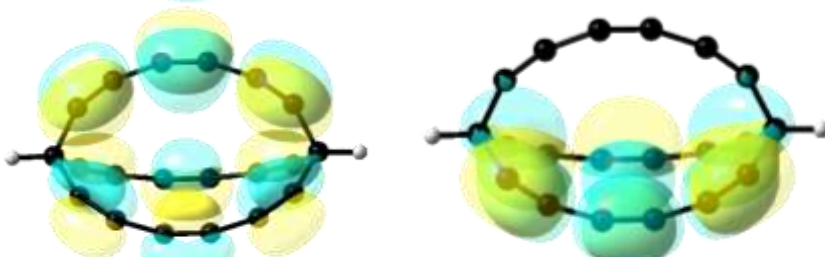

**Anionic BIN**  
( $\alpha$ -spin state)

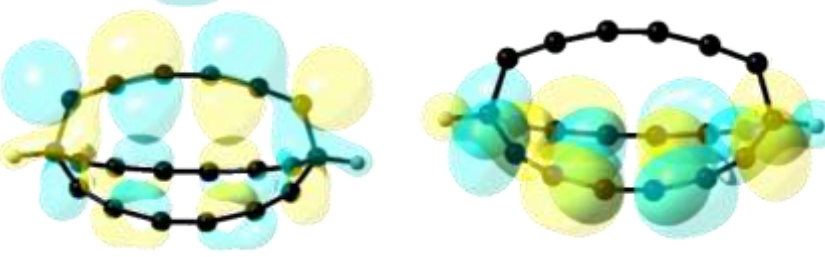

**Anionic BIN**  
( $\beta$ -spin state)

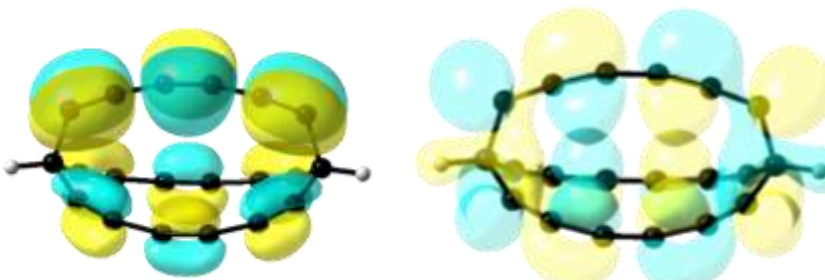

**Figure S2.** HOMO and LUMO of the neutral and charged BTH and BIN cages

### S3. MESP and NPA charges on BTH cage

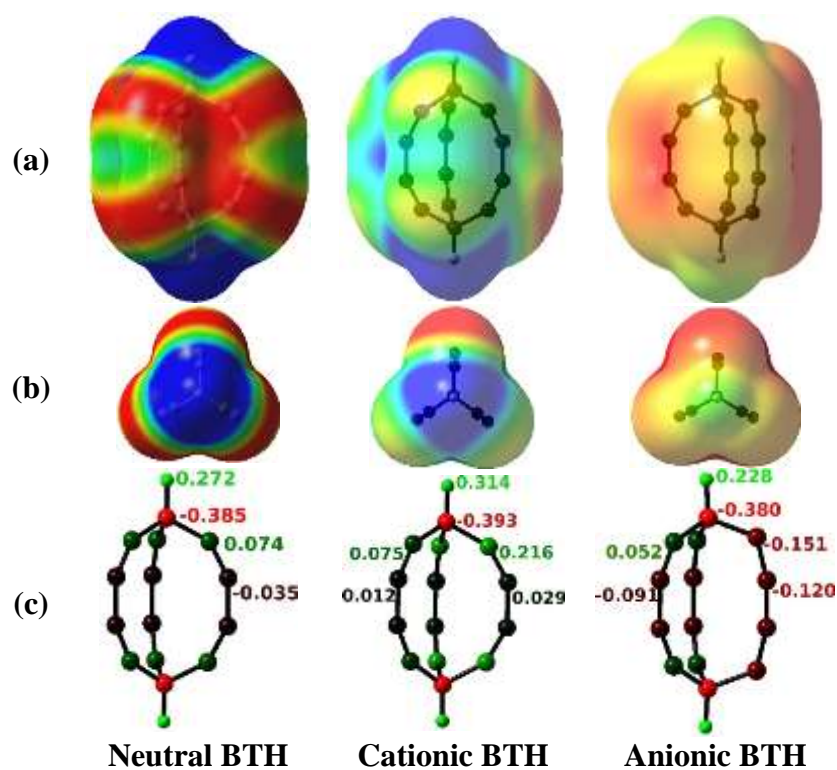

**Figure S3.** MESP and NPA charges on neutral and charged BTH cage. (a) Side view of the electrostatic potential, (b) Top view of the electrostatic potential, and (c) Atomic charges.

### S4. Photophysical properties of neutral and charged BBP cages

**Table S4.** Oscillatory strength, excitation wavelength and absorption coefficient for the most important optical excitations in the neutral and charged BBP cages.

| System       | Oscillatory strength (f) | Excitation Wavelength ( $\lambda$ ) in nm | Absorption coefficient ( $\epsilon$ ) in $\text{Lmol}^{-1}\text{cm}^{-1}$ |
|--------------|--------------------------|-------------------------------------------|---------------------------------------------------------------------------|
| Neutral BTH  | 0.027                    | 315.51                                    | 939.11                                                                    |
|              | 0.053                    | 251.69                                    | 1796.40                                                                   |
| Anionic BTH  | 0.012                    | 733.29                                    | 972.01                                                                    |
|              | 0.013                    | 700.44                                    | 997.28                                                                    |
|              | 0.078                    | 386.22                                    | 3077.34                                                                   |
| Cationic BTH | 0.022                    | 676.18                                    | 1399.84                                                                   |
|              | 0.060                    | 522.16                                    | 2342.62                                                                   |
|              | 0.015                    | 385.97                                    | 650.20                                                                    |
| Neutral BIN  | 0.018                    | 339.28                                    | 600.06                                                                    |
|              | 0.042                    | 256.52                                    | 1407.37                                                                   |
| Anionic BIN  | 0.013                    | 717.54                                    | 833.25                                                                    |
|              | 0.063                    | 505.69                                    | 4532.03                                                                   |
|              | 0.016                    | 454.56                                    | 4620.76                                                                   |
| Cationic BIN | 0.075                    | 454.17                                    | 4620.76                                                                   |
|              | 0.044                    | 1010.24                                   | 2617.74                                                                   |
|              | 0.051                    | 790.53                                    | 2865.76                                                                   |
|              | 0.021                    | 560.62                                    | 1636.03                                                                   |
|              | 0.018                    | 526.49                                    | 1441.98                                                                   |



**S5. Optimized geometries of the complexes of BTH cage with guest (Li<sup>+</sup>, Li, Ne, Ar) atom/ion.**

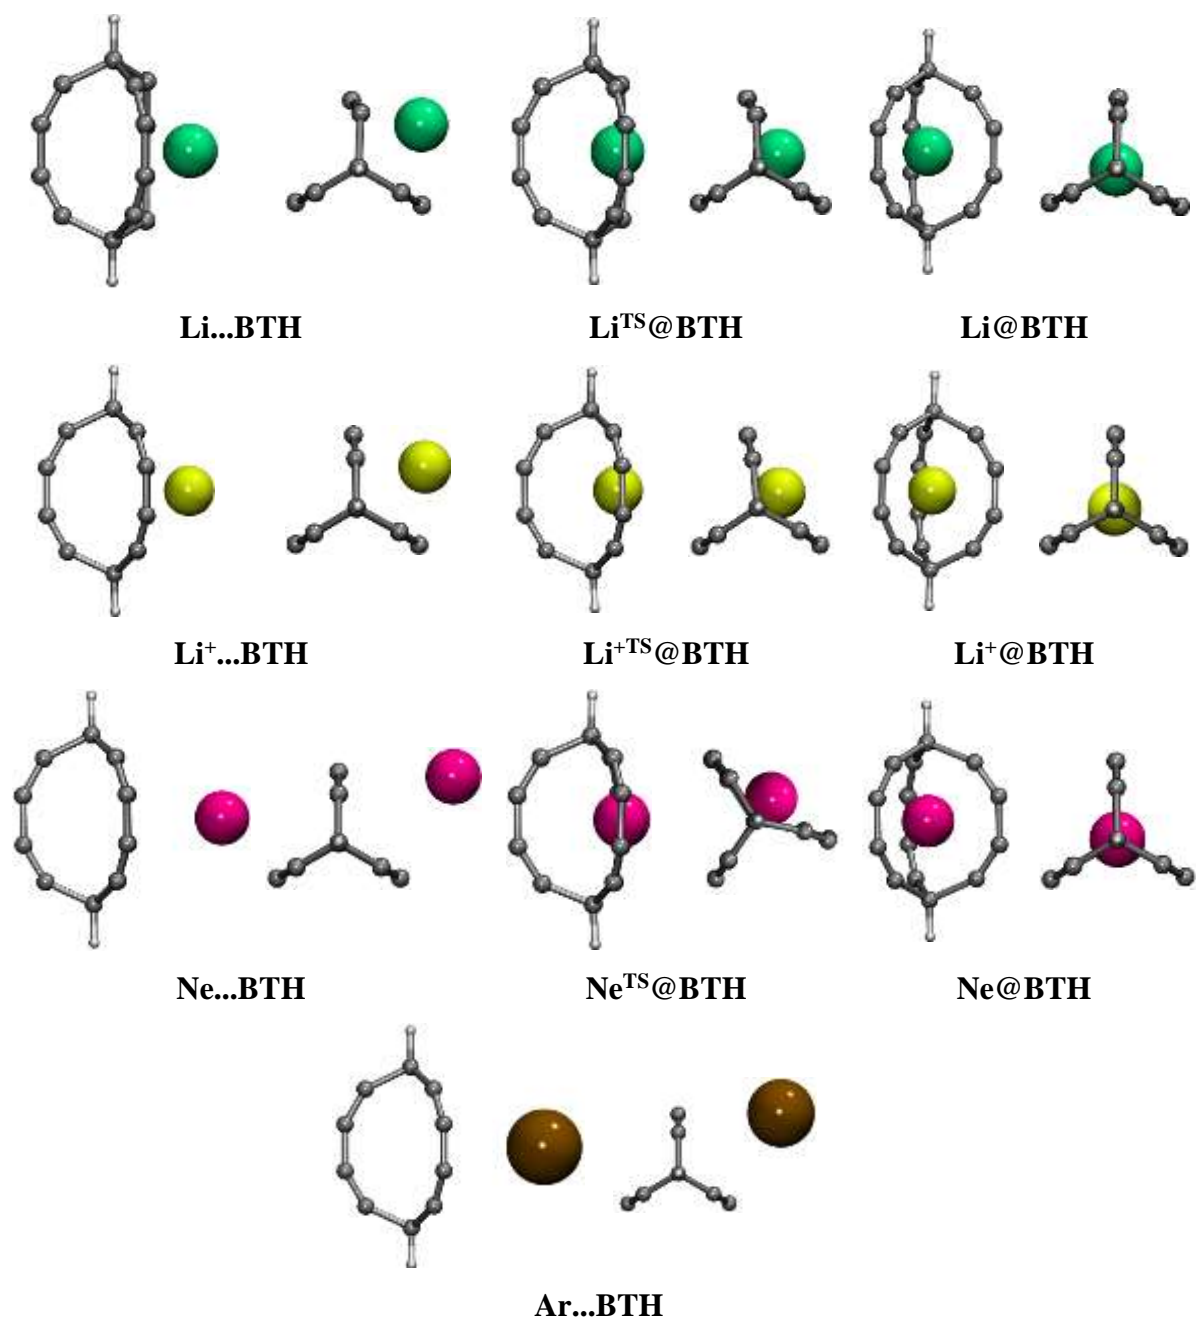

**Figure S4.** Side and top view of the optimized geometries the complexes of BTH cage with guest (Li<sup>+</sup>, Li, Ne, Ar) atom/ion in their electronic ground state.



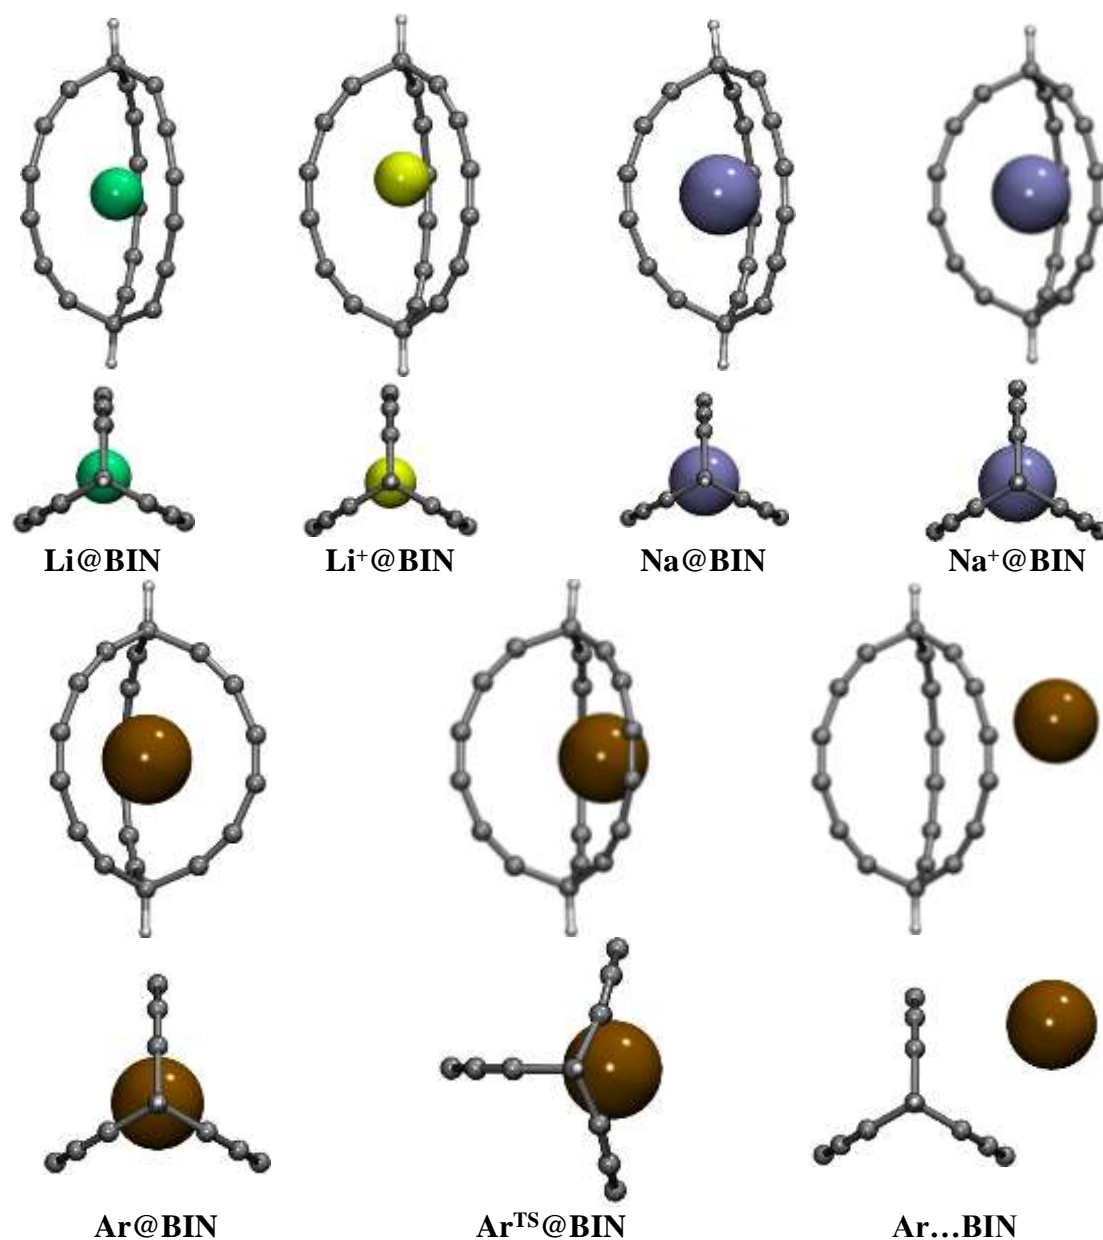

**Figure S5.** Side and top view of the optimized geometries the complexes of BIN cage with guest (Li, Na, and Ar) atom/ion in their electronic ground state.

**Table S5.** Geometrical parameters and deformation parameter (DP) in the complexes of BTH cage.

| Endohedral complex of Li with BTH (Li@BTH) |           |         |        |           |         |             |         |        |
|--------------------------------------------|-----------|---------|--------|-----------|---------|-------------|---------|--------|
|                                            |           |         |        | Arm1      |         | Arm2 = Arm3 |         |        |
| DP                                         |           |         |        | DP        |         | DP          |         |        |
| <b>C – C</b>                               |           |         |        |           |         |             |         |        |
| <b>Distance</b>                            | <b>d1</b> | 1.912   | -0.046 | <b>X1</b> | 1.560   | 0.061       | 1.506   | 0.007  |
|                                            | <b>d2</b> | 1.983   | 0.025  | <b>X2</b> | 1.249   | 0.042       | 1.216   | 0.009  |
|                                            | <b>d3</b> | 1.983   | 0.025  | <b>X3</b> | 1.349   | -0.037      | 1.391   | 0.005  |
|                                            | <b>d4</b> | 4.786   | 0.015  |           |         |             |         |        |
| <b>Angle</b>                               | <b>a1</b> | 105.650 | 3.002  | <b>a4</b> | 113.141 | -2.507      | 114.840 | -0.808 |
|                                            | <b>a2</b> | 105.650 | 3.002  | <b>a5</b> | 130.537 | -15.261     | 147.973 | 2.175  |

a3 101.532 -1.116 a6 159.925 10.074 148.060 -1.791  
**Li – C Distances:** Li – C (Arm1) = 2.028, Li – C (Arm2=Arm3) = 2.101 ; Li – CH = 2.393

**TS complex of Li with BTH (Li<sup>TS</sup>@BTH)**

|                                                                                                                    |           | DP      |        | Arm1      |         | Arm2    |         | DP     |
|--------------------------------------------------------------------------------------------------------------------|-----------|---------|--------|-----------|---------|---------|---------|--------|
| <b>C – C</b>                                                                                                       |           |         |        |           |         |         |         |        |
| <b>Distance</b>                                                                                                    | <b>d1</b> | 1.954   | -0.004 | <b>X1</b> | 1.568   | 0.069   | 1.491   | -0.008 |
|                                                                                                                    | <b>d2</b> | 2.054   | 0.096  | <b>X2</b> | 1.253   | 0.046   | 1.213   | 0.006  |
|                                                                                                                    | <b>d3</b> | 1.936   | -0.022 | <b>X3</b> | 1.357   | -0.029  | 1.376   | -0.010 |
|                                                                                                                    | <b>d4</b> | 4.749   | -0.022 |           |         |         |         |        |
| <b>Angle</b>                                                                                                       | <b>a1</b> | 107.085 | 4.437  | <b>a4</b> | 112.167 | -3.481  | 116.007 | 0.359  |
|                                                                                                                    | <b>a2</b> | 106.265 | 3.617  | <b>a5</b> | 132.139 | -13.659 | 143.138 | -2.660 |
|                                                                                                                    | <b>a3</b> | 100.595 | -2.053 | <b>a6</b> | 154.956 | 5.105   | 145.092 | -4.759 |
| <b>Li – C Distances:</b> Li – C (Arm1) = 1.985; Li – C (Arm2=Arm3) = 1.930 ; Li – CH = 2.469 ; Li – Center = 0.660 |           |         |        |           |         |         |         |        |

**Exohedral complex of Li with BTH (Li...BTH)**

|                                                                                                                 |           | DP      |        | Arm1      |         | Arm2    |         | DP     |
|-----------------------------------------------------------------------------------------------------------------|-----------|---------|--------|-----------|---------|---------|---------|--------|
| <b>C – C</b>                                                                                                    |           |         |        |           |         |         |         |        |
| <b>Distance</b>                                                                                                 | <b>d1</b> | 1.809   | -0.149 | <b>X1</b> | 1.559   | 0.060   | 1.495   | -0.004 |
|                                                                                                                 | <b>d2</b> | 1.922   | -0.036 | <b>X2</b> | 1.259   | 0.052   | 1.213   | 0.006  |
|                                                                                                                 | <b>d3</b> | 1.984   | 0.026  | <b>X3</b> | 1.336   | -0.050  | 1.393   | 0.007  |
|                                                                                                                 | <b>d4</b> | 4.800   | 0.029  |           |         |         |         |        |
| <b>Angle</b>                                                                                                    | <b>a1</b> | 103.084 | 0.436  | <b>a4</b> | 112.794 | -2.854  | 114.653 | -0.995 |
|                                                                                                                 | <b>a2</b> | 107.388 | 4.740  | <b>a5</b> | 125.075 | -20.723 | 149.723 | 3.925  |
|                                                                                                                 | <b>a3</b> | 101.560 | -1.088 | <b>a6</b> | 160.430 | 10.579  | 147.402 | -2.449 |
| <b>Li – C Distances:</b> Li – C (Arm1) = 2.093 and Li – C (Arm2) = 2.256 ; Li – CH = 3.149; Li – Centre = 2.038 |           |         |        |           |         |         |         |        |

**Endohedral complex of Li<sup>+</sup> with BTH (Li<sup>+</sup>@BTH)**

|                                                                                                 |           | DP      |        | Arm1 = Arm2 = Arm3 |         | DP     |
|-------------------------------------------------------------------------------------------------|-----------|---------|--------|--------------------|---------|--------|
| <b>C – C</b>                                                                                    |           |         |        |                    |         |        |
| <b>Distance</b>                                                                                 | <b>d1</b> | 2.006   | 0.048  | <b>X1</b>          | 1.513   | 0.014  |
|                                                                                                 | <b>d2</b> | 2.006   | 0.048  | <b>X2</b>          | 1.211   | 0.004  |
|                                                                                                 | <b>d3</b> | 2.006   | 0.048  | <b>X3</b>          | 1.399   | 0.013  |
|                                                                                                 | <b>d4</b> | 4.775   | 0.004  |                    |         |        |
| <b>Angle</b>                                                                                    | <b>a1</b> | 102.224 | -0.424 | <b>a4</b>          | 116.000 | 0.352  |
|                                                                                                 | <b>a2</b> | 102.224 | -0.424 | <b>a5</b>          | 148.231 | 2.433  |
|                                                                                                 | <b>a3</b> | 102.224 | -0.424 | <b>a6</b>          | 147.769 | -2.082 |
| <b>Li<sup>+</sup> – C Distances:</b> Li <sup>+</sup> – C = 2.124 ; Li <sup>+</sup> – CH = 2.387 |           |         |        |                    |         |        |

**TS complex of Li<sup>+</sup> with BTH (Li<sup>+</sup><sup>TS</sup>@BTH)**

|                 |           | DP    |       | Arm1      |       | Arm2 = Arm3 |       | DP    |
|-----------------|-----------|-------|-------|-----------|-------|-------------|-------|-------|
| <b>Distance</b> | <b>d1</b> | 1.959 | 0.001 | <b>X1</b> | 1.498 | -0.001      | 1.522 | 0.023 |
|                 | <b>d2</b> | 2.059 | 0.101 | <b>X2</b> | 1.207 | 0.000       | 1.214 | 0.007 |

|              |           |         |        |           |         |        |         |        |
|--------------|-----------|---------|--------|-----------|---------|--------|---------|--------|
|              | <b>d3</b> | 2.059   | 0.101  | <b>X3</b> | 1.386   | 0.000  | 1.410   | 0.024  |
|              | <b>d4</b> | 4.737   | -0.034 |           |         |        |         |        |
| <b>Angle</b> | <b>a1</b> | 101.57  | -1.078 | <b>a4</b> | 117.043 | 1.395  | 114.908 | -0.740 |
|              | <b>a2</b> | 101.57  | -1.078 | <b>a5</b> | 144.533 | -1.265 | 150.425 | 4.627  |
|              | <b>a3</b> | 104.935 | 2.287  | <b>a6</b> | 150.240 | 0.389  | 145.176 | -4.675 |

**Li+ – C Distances:** Li+ – C = 1.986; Li+ – CH = 2.490 ; Li+ – centre = 0.766

---



---

**Exohedral complex of Li<sup>+</sup> with BTH (Li<sup>+</sup>...BTH)**

|                 |           |         |        |           | <b>Arm1</b> |        | <b>Arm2 = Arm3</b> |        |
|-----------------|-----------|---------|--------|-----------|-------------|--------|--------------------|--------|
|                 |           |         |        |           | <b>DP</b>   |        | <b>DP</b>          |        |
| <b>Distance</b> | <b>d1</b> | 1.938   | -0.020 | <b>X1</b> | 1.494       | -0.005 | 1.500              | 0.001  |
|                 | <b>d2</b> | 1.994   | 0.036  | <b>X2</b> | 1.206       | -0.001 | 1.210              | 0.003  |
|                 | <b>d3</b> | 1.994   | 0.036  | <b>X3</b> | 1.384       | -0.002 | 1.394              | 0.008  |
|                 | <b>d4</b> | 4.777   | 0.006  |           |             |        |                    |        |
| <b>Angle</b>    | <b>a1</b> | 102.264 | -0.384 | <b>a4</b> | 116.972     | 1.324  | 115.730            | 0.082  |
|                 | <b>a2</b> | 102.264 | -0.384 | <b>a5</b> | 144.870     | -0.928 | 148.662            | 2.864  |
|                 | <b>a3</b> | 101.608 | -1.040 | <b>a6</b> | 150.691     | 0.840  | 147.603            | -2.248 |

**Li+ – C Distances:** Li+ – C = 2.244; Li+ – CH = 3.227 ; Li+ – centre = 2.170

---



---



---



---

**Endohedral complex of Ne with BTH (Ne@BTH)**

|                 |           |         |        |           | <b>Arm1 = Arm2 = Arm3</b> |        |  |
|-----------------|-----------|---------|--------|-----------|---------------------------|--------|--|
|                 |           |         |        |           | <b>DP</b>                 |        |  |
| <b>Distance</b> | <b>d1</b> | 2.126   | 0.168  | <b>X1</b> | 1.542                     | 0.043  |  |
|                 | <b>d2</b> | 2.126   | 0.168  | <b>X2</b> | 1.218                     | 0.011  |  |
|                 | <b>d3</b> | 2.126   | 0.168  | <b>X3</b> | 1.419                     | 0.033  |  |
|                 | <b>d4</b> | 4.600   | -0.171 |           |                           |        |  |
| <b>Angle</b>    | <b>a1</b> | 105.947 | 3.299  | <b>a4</b> | 112.800                   | -2.848 |  |
|                 | <b>a2</b> | 105.947 | 3.299  | <b>a5</b> | 148.139                   | 2.341  |  |
|                 | <b>a3</b> | 105.947 | 3.299  | <b>a6</b> | 144.661                   | -5.190 |  |

**Ne – C Distances:** Ne – C = 2.241; Ne – CH = 2.300

---



---



---



---

**TS complex of Ne with BTH (Ne<sup>TS</sup>@BTH)**

|                 |           |         |        |           | <b>Arm1</b> |        | <b>Arm2 = Arm3</b> |        |
|-----------------|-----------|---------|--------|-----------|-------------|--------|--------------------|--------|
|                 |           |         |        |           | <b>DP</b>   |        | <b>DP</b>          |        |
| <b>Distance</b> | <b>d1</b> | 2.029   | 0.071  | <b>X1</b> | 1.498       | -0.001 | 1.569              | 0.07   |
|                 | <b>d2</b> | 2.173   | 0.215  | <b>X2</b> | 1.208       | 0.001  | 1.222              | 0.015  |
|                 | <b>d3</b> | 2.173   | 0.215  | <b>X3</b> | 1.387       | 0.001  | 1.435              | 0.049  |
|                 | <b>d4</b> | 4.597   | -0.174 |           |             |        |                    |        |
| <b>Angle</b>    | <b>a1</b> | 100.925 | -1.723 | <b>a4</b> | 114.919     | -0.729 | 111.761            | -3.887 |
|                 | <b>a2</b> | 100.925 | -1.723 | <b>a5</b> | 145.681     | -0.117 | 148.337            | 2.539  |
|                 | <b>a3</b> | 115.75  | 13.102 | <b>a6</b> | 147.403     | -2.448 | 143.329            | -6.522 |

**Ne – C Distances:** Ne – C (Arm2=Arm3) = 2.168; Ne – CH = 2.366; Ne – centre = 0.564

---



---



---



---

**Exohedral complex of Ne with BTH (Ne...BTH)**

|                 |           |       |       |           | <b>Arm1</b> |       | <b>Arm2 = Arm3</b> |       |
|-----------------|-----------|-------|-------|-----------|-------------|-------|--------------------|-------|
|                 |           |       |       |           | <b>DP</b>   |       | <b>DP</b>          |       |
| <b>Distance</b> | <b>d1</b> | 1.958 | 0.000 | <b>X1</b> | 1.500       | 0.001 | 1.500              | 0.001 |

|              |           |         |       |           |         |        |         |        |
|--------------|-----------|---------|-------|-----------|---------|--------|---------|--------|
|              | <b>d2</b> | 1.958   | 0.000 | <b>X2</b> | 1.207   | 0.000  | 1.207   | 0.000  |
|              | <b>d3</b> | 1.958   | 0.000 | <b>X3</b> | 1.386   | 0.000  | 1.386   | 0.000  |
|              | <b>d4</b> | 4.771   | 0.000 |           |         |        |         |        |
| <b>Angle</b> | <b>a1</b> | 102.651 | 0.003 | <b>a4</b> | 115.642 | -0.006 | 115.644 | -0.004 |
|              | <b>a2</b> | 102.651 | 0.003 | <b>a5</b> | 145.836 | 0.038  | 145.779 | -0.019 |
|              | <b>a3</b> | 102.662 | 0.014 | <b>a6</b> | 149.819 | -0.032 | 149.858 | 0.007  |

**Ne – C Distances:** Ne – C = 3.246 ; Ne – CH = 4.366 ; Ne – Centre = 3.657

---



---

| <b>Exohedral complex of Ar with BTH (Ar...BTH)</b> |           |         |           |           |             |           |                        |           |
|----------------------------------------------------|-----------|---------|-----------|-----------|-------------|-----------|------------------------|-----------|
|                                                    |           |         |           |           | <b>Arm1</b> |           | <b>Arm2 =<br/>Arm3</b> |           |
|                                                    |           |         | <b>DP</b> |           |             | <b>DP</b> |                        | <b>DP</b> |
| <b>Distance</b>                                    | <b>d1</b> | 1.958   | 0.000     | <b>X1</b> | 1.499       | 0.000     | 1.499                  | 0.000     |
|                                                    | <b>d2</b> | 1.958   | 0.000     | <b>X2</b> | 1.207       | 0.000     | 1.207                  | 0.000     |
|                                                    | <b>d3</b> | 1.958   | 0.000     | <b>X3</b> | 1.386       | 0.000     | 1.386                  | 0.000     |
|                                                    | <b>d4</b> | 4.771   | 0.000     |           |             |           |                        |           |
| <b>Angle</b>                                       | <b>a1</b> | 102.645 | -0.003    | <b>a4</b> | 115.651     | 0.003     | 115.500                | -0.148    |
|                                                    | <b>a2</b> | 102.645 | -0.003    | <b>a5</b> | 145.796     | -0.002    | 145.805                | 0.007     |
|                                                    | <b>a3</b> | 102.649 | 0.001     | <b>a6</b> | 149.853     | 0.002     | 149.845                | -0.006    |

**Ar – C Distances:** Ar – C Arm = 3.503 ; Ar – CH = 4.625 ; Ar – Centre = 3.962

\* All the distances are given in Ang and angle are in ° (degree)

---



---

**Table S6. Geometrical parameters and deformation parameter (DP) in the complexes of BIN cage.**

| <b>Endohedral complex of Li with BIN (Li@BIN)</b>                                |           |             |        |           |         |                    |         |        |  |
|----------------------------------------------------------------------------------|-----------|-------------|--------|-----------|---------|--------------------|---------|--------|--|
|                                                                                  |           | <b>Arm1</b> |        |           |         | <b>Arm2 = Arm3</b> |         |        |  |
|                                                                                  |           | <b>DP</b>   |        | <b>DP</b> |         | <b>DP</b>          |         |        |  |
| <b>Distance</b>                                                                  | <b>d1</b> | 2.134       | -0.486 | <b>X1</b> | 1.521   | 0.035              | 1.483   | -0.003 |  |
|                                                                                  | <b>d2</b> | 2.456       | -0.164 | <b>X2</b> | 1.241   | 0.035              | 1.210   | 0.004  |  |
|                                                                                  | <b>d3</b> | 2.456       | -0.164 | <b>X3</b> | 1.336   | -0.036             | 1.369   | -0.003 |  |
|                                                                                  | <b>d4</b> | 7.155       | 0.308  | <b>X4</b> | 1.247   | 0.036              | 1.216   | 0.005  |  |
| <b>Angle</b>                                                                     | <b>a1</b> | 104.894     | 0.811  | <b>a4</b> | 114.445 | 0.010              | 114.876 | 0.441  |  |
|                                                                                  | <b>a2</b> | 104.894     | 0.811  | <b>a5</b> | 131.474 | -23.007            | 153.778 | -0.703 |  |
|                                                                                  | <b>a3</b> | 101.394     | -2.689 | <b>a6</b> | 171.214 | 10.266             | 160.029 | -0.919 |  |
|                                                                                  |           |             |        | <b>a7</b> | 166.700 | 7.694              | 163.562 | 4.556  |  |
| <b>Li–C Distances:</b> Li–C (Arm1) = 2.134 ; Li–C (Arm2) = 2.456 ; Li–CH = 3.578 |           |             |        |           |         |                    |         |        |  |

  

| <b>Endohedral complex of Li<sup>+</sup> with BIN (Li<sup>+</sup>@BIN)</b>                |           |                    |        |           |         |                    |            |         |        |
|------------------------------------------------------------------------------------------|-----------|--------------------|--------|-----------|---------|--------------------|------------|---------|--------|
|                                                                                          |           | <b>Arm2 = Arm3</b> |        |           |         | <b>Arm2 = Arm3</b> |            |         |        |
|                                                                                          |           | <b>DP</b>          |        | <b>DP</b> |         | <b>DP</b>          |            |         |        |
| <b>Distance</b>                                                                          | <b>d1</b> | 2.508              | -0.112 | <b>X1</b> | 1.488   | 0.002              | <b>X1'</b> | 1.486   | 0.000  |
|                                                                                          | <b>d2</b> | 2.508              | -0.112 | <b>X2</b> | 1.207   | 0.001              | <b>X2'</b> | 1.205   | -0.001 |
|                                                                                          | <b>d3</b> | 2.508              | -0.112 | <b>X3</b> | 1.373   | 0.001              | <b>X3'</b> | 1.371   | -0.001 |
|                                                                                          | <b>d4</b> | 7.007              | 0.160  | <b>X4</b> | 1.213   | 0.002              |            |         |        |
| <b>Angle</b>                                                                             | <b>a1</b> | 102.665            | -1.418 | <b>a4</b> | 115.635 | 1.200              | <b>a4'</b> | 115.656 | 1.221  |
|                                                                                          | <b>a2</b> | 102.665            | -1.418 | <b>a5</b> | 153.664 | -0.817             | <b>a5'</b> | 154.045 | -0.436 |
|                                                                                          | <b>a3</b> | 102.665            | -1.418 | <b>a6</b> | 160.424 | -0.524             | <b>a6'</b> | 158.942 | -2.006 |
|                                                                                          |           |                    |        | <b>a7</b> | 160.451 | 1.445              | <b>a7'</b> | 163.765 | 4.759  |
| <b>Li–C Distances:</b> Li <sup>+</sup> – C = 2.527 ; Li1 – CH = 3.087 ; Li1 – CH = 3.920 |           |                    |        |           |         |                    |            |         |        |

  

| <b>Endohedral complex of Na with BIN (Na@BIN)</b> |           |             |        |           |       |                    |       |        |  |
|---------------------------------------------------|-----------|-------------|--------|-----------|-------|--------------------|-------|--------|--|
|                                                   |           | <b>Arm1</b> |        |           |       | <b>Arm2 = Arm3</b> |       |        |  |
|                                                   |           | <b>DP</b>   |        | <b>DP</b> |       | <b>DP</b>          |       |        |  |
| <b>Distance</b>                                   | <b>d1</b> | 2.451       | -0.169 | <b>X1</b> | 1.523 | 0.037              | 1.481 | -0.005 |  |

|              |           |         |        |           |         |         |         |        |
|--------------|-----------|---------|--------|-----------|---------|---------|---------|--------|
|              | <b>d2</b> | 2.591   | -0.029 | <b>X2</b> | 1.244   | 0.038   | 1.210   | 0.004  |
|              | <b>d3</b> | 2.591   | -0.029 | <b>X3</b> | 1.333   | -0.039  | 1.372   | 0.000  |
|              | <b>d4</b> | 6.930   | 0.083  | <b>X4</b> | 1.248   | 0.037   | 1.216   | 0.005  |
| <b>Angle</b> | <b>a1</b> | 106.104 | 2.021  | <b>a4</b> | 113.794 | -0.641  | 113.709 | -0.726 |
|              | <b>a2</b> | 106.104 | 2.021  | <b>a5</b> | 131.941 | -22.540 | 158.867 | 4.386  |
|              | <b>a3</b> | 102.416 | -1.667 | <b>a6</b> | 172.548 | 11.600  | 158.406 | -2.542 |
|              |           |         |        | <b>a7</b> | 162.409 | 3.403   | 158.777 | -0.229 |

**Na–C Distances:** Na–C (Arm1) = 2.529 ; Na–C (Arm2) = 2.661 ; Na–CH = 3.466

---



---

**Endohedral complex of Na<sup>+</sup> with BIN (Na<sup>+</sup>@BIN)**

|                 |           | DP      |        |           | Arm1 = Arm2 =<br>Arm3 |        |  |  |
|-----------------|-----------|---------|--------|-----------|-----------------------|--------|--|--|
| <b>Distance</b> | <b>d1</b> | 2.658   | 0.038  | <b>X1</b> | 1.487                 | 0.001  |  |  |
|                 | <b>d2</b> | 2.658   | 0.038  | <b>X2</b> | 1.206                 | 0.000  |  |  |
|                 | <b>d3</b> | 2.658   | 0.038  | <b>X3</b> | 1.375                 | 0.003  |  |  |
|                 | <b>d4</b> | 6.819   | -0.028 | <b>X4</b> | 1.213                 | 0.002  |  |  |
| <b>Angle</b>    | <b>a1</b> | 103.578 | -0.505 | <b>a4</b> | 114.866               | 0.431  |  |  |
|                 | <b>a2</b> | 103.578 | -0.505 | <b>a5</b> | 156.691               | 2.210  |  |  |
|                 | <b>a3</b> | 103.578 | -0.505 | <b>a6</b> | 159.720               | -1.228 |  |  |
|                 |           |         |        | <b>a7</b> | 158.456               | -0.550 |  |  |

**Na+–C Distances:** Na1 – C = 2.727 ; Na1 – CH = 3.409

---



---

**Endohedral complex of K with BIN (K@BIN)**

|                       |           | DP      |        |           | Arm1    |         | Arm2    |        | Arm3    |
|-----------------------|-----------|---------|--------|-----------|---------|---------|---------|--------|---------|
|                       |           | DP      |        |           | DP      |         | DP      |        |         |
| <b>C – C Distance</b> | <b>d1</b> | 2.698   | 0.078  | <b>X1</b> | 1.522   | 0.036   | 1.485   | -0.001 | 1.486   |
|                       | <b>d2</b> | 2.760   | 0.140  | <b>X2</b> | 1.242   | 0.036   | 1.212   | 0.006  | 1.212   |
|                       | <b>d3</b> | 2.762   | 0.142  | <b>X3</b> | 1.339   | -0.033  | 1.376   | 0.004  | 1.376   |
|                       | <b>d4</b> | 6.678   | -0.169 | <b>X4</b> | 1.249   | 0.038   | 1.217   | 0.006  | 1.217   |
| <b>Angle</b>          | <b>a1</b> | 107.281 | 3.198  | <b>a4</b> | 112.810 | -1.625  | 112.405 | -2.030 | 112.375 |
|                       | <b>a2</b> | 107.189 | 3.106  | <b>a5</b> | 137.502 | -16.979 | 161.904 | 7.423  | 162.036 |

**a3** 104.234 0.151 **a6** 172.664 11.716 157.853 -3.095 157.824  
**a7** 156.145 -2.861 155.655 -3.351 155.626

**K–C Distances:** K–C (Arm1) = 2.769; K–C (Arm2) = 2.829; K–C (Arm3) = 2.826; K–CH = 3.339

---



---

**TS complex of K with BIN (K<sup>TS</sup>@BIN)**

|                       |           | Arm1    |        |           | Arm2    |         | Arm3    |        |         |
|-----------------------|-----------|---------|--------|-----------|---------|---------|---------|--------|---------|
|                       |           | DP      |        |           | DP      |         | DP      |        |         |
| <b>C – C Distance</b> | <b>d1</b> | 2.717   | 0.097  | <b>X1</b> | 1.521   | 0.035   | 1.494   | 0.008  | 1.481   |
|                       | <b>d2</b> | 2.930   | 0.310  | <b>X2</b> | 1.246   | 0.040   | 1.212   | 0.006  | 1.210   |
|                       | <b>d3</b> | 2.489   | -0.131 | <b>X3</b> | 1.343   | -0.029  | 1.383   | 0.011  | 1.364   |
|                       | <b>d4</b> | 6.637   | -0.210 | <b>X4</b> | 1.250   | 0.039   | 1.217   | 0.006  | 1.215   |
| <b>Angle</b>          | <b>a1</b> | 106.897 | 2.814  | <b>a4</b> | 111.991 | -2.444  | 111.616 | -2.819 | 114.260 |
|                       | <b>a2</b> | 109.176 | 5.093  | <b>a5</b> | 139.399 | -15.082 | 163.247 | 8.766  | 151.733 |
|                       | <b>a3</b> | 102.345 | -1.738 | <b>a6</b> | 163.581 | 2.633   | 156.959 | -3.989 | 160.488 |
|                       |           |         |        | <b>a7</b> | 154.790 | -4.216  | 154.603 | -4.403 | 158.371 |

**K–C Distances:** K–C (Arm1) = 2.681; K–C (Arm2) = 2.749; K–C (Arm3) = 3.642; K–CH = 3.443; K–Centre = 1.103

---



---



---



---

**Exohedral complex of K with BIN (K...BIN)**

|                       |           | Arm1    |        |           | Arm2    |         | Arm3    |        |         |
|-----------------------|-----------|---------|--------|-----------|---------|---------|---------|--------|---------|
|                       |           | DP      |        |           | DP      |         | DP      |        |         |
| <b>C – C Distance</b> | <b>d1</b> | 2.429   | -0.191 | <b>X1</b> | 1.526   | 0.040   | 1.481   | -0.005 | 1.480   |
|                       | <b>d2</b> | 2.477   | -0.143 | <b>X2</b> | 1.249   | 0.043   | 1.209   | 0.003  | 1.208   |
|                       | <b>d3</b> | 2.718   | 0.098  | <b>X3</b> | 1.330   | -0.042  | 1.373   | 0.001  | 1.368   |
|                       | <b>d4</b> | 6.885   | 0.038  | <b>X4</b> | 1.249   | 0.038   | 1.214   | 0.003  | 1.212   |
| <b>Angle</b>          | <b>a1</b> | 107.652 | 3.569  | <b>a4</b> | 112.925 | -1.510  | 112.928 | -1.507 | 114.461 |
|                       | <b>a2</b> | 105.450 | 1.367  | <b>a5</b> | 130.901 | -23.580 | 160.612 | 6.131  | 153.561 |
|                       | <b>a3</b> | 102.526 | -1.557 | <b>a6</b> | 169.531 | 8.583   | 158.610 | -2.338 | 161.460 |
|                       |           |         |        | <b>a7</b> | 160.472 | 1.466   | 157.966 | -1.040 | 159.476 |

**K–C Distances:** K–C (Arm1) = 2.741; K0 – C (Arm2) = 2.874; K–C (Arm3) = 5.066; K–CH = 4.249; K–Centre = 2.598

---



---

**Endohedral complex of Ne with BIN (Ne@BIN)**



|                       |           | Arm1=Arm2 = Arm3 |        |           |         |        |
|-----------------------|-----------|------------------|--------|-----------|---------|--------|
|                       |           | DP               |        | DP        |         |        |
| <b>C – C Distance</b> | <b>d1</b> | 2.739            | 0.119  | <b>X1</b> | 1.486   | 0.000  |
|                       | <b>d2</b> | 2.739            | 0.119  | <b>X2</b> | 1.206   | 0.000  |
|                       | <b>d3</b> | 2.739            | 0.119  | <b>X3</b> | 1.374   | 0.002  |
|                       | <b>d4</b> | 6.675            | -0.172 | <b>x4</b> | 1.211   | 0.000  |
| <b>Angle</b>          | <b>a1</b> | 104.914          | 0.831  | <b>a4</b> | 113.715 | -0.720 |
|                       | <b>a2</b> | 104.914          | 0.831  | <b>a5</b> | 157.211 | 2.730  |
|                       | <b>a3</b> | 104.914          | 0.831  | <b>a6</b> | 160.024 | -0.924 |
|                       |           |                  |        | <b>a7</b> | 156.479 | -2.527 |

Ne–C Distances: Ne – C = 2.805; Ne – CH = 3.338

| TS complex of Ne with BIN (Ne <sup>TS</sup> @BIN) |           |         |        |           |             |        |         |        |
|---------------------------------------------------|-----------|---------|--------|-----------|-------------|--------|---------|--------|
|                                                   |           | Arm1    |        |           | Arm2 = Arm3 |        |         |        |
|                                                   |           | DP      |        | DP        |             | DP     |         |        |
| <b>Distance</b>                                   | <b>d1</b> | 2.721   | 0.101  | <b>X1</b> | 1.486       | 0.000  | 1.488   | 0.002  |
|                                                   | <b>d2</b> | 2.798   | 0.178  | <b>X2</b> | 1.205       | -0.001 | 1.207   | 0.001  |
|                                                   | <b>d3</b> | 2.798   | 0.178  | <b>X3</b> | 1.371       | -0.001 | 1.371   | -0.001 |
|                                                   | <b>d4</b> | 6.620   | -0.227 | <b>X4</b> | 1.210       | -0.001 | 1.212   | 0.001  |
| <b>Angle</b>                                      | <b>a1</b> | 103.863 | -0.220 | <b>a4</b> | 114.021     | -0.414 | 113.269 | -1.166 |
|                                                   | <b>a2</b> | 103.863 | -0.220 | <b>a5</b> | 154.349     | -0.132 | 159.107 | 4.626  |
|                                                   | <b>a3</b> | 107.668 | 3.585  | <b>a6</b> | 159.983     | -0.965 | 159.797 | -1.151 |
|                                                   |           |         |        | <b>a7</b> | 157.440     | -1.566 | 154.717 | -4.289 |

Ne–C Distances: Ne – C = 2.629 ; Ne – CH = 3.501 ; Ne – Centre = 1.143

| Exohedral complex of Ne with BIN (Ne...BIN) |           |             |        |           |             |       |            |       |        |
|---------------------------------------------|-----------|-------------|--------|-----------|-------------|-------|------------|-------|--------|
|                                             |           | Arm2 = Arm3 |        |           | Arm2 = Arm3 |       |            |       |        |
|                                             |           | DP          |        | DP        |             | DP    |            |       |        |
| <b>Distance</b>                             | <b>d1</b> | 2.508       | -0.112 | <b>X1</b> | 1.488       | 0.002 | <b>X1'</b> | 1.486 | 0.000  |
|                                             | <b>d2</b> | 2.508       | -0.112 | <b>X2</b> | 1.207       | 0.001 | <b>X2'</b> | 1.205 | -0.001 |
|                                             | <b>d3</b> | 2.508       | -0.112 | <b>X3</b> | 1.373       | 0.001 | <b>X3'</b> | 1.371 | -0.001 |
|                                             | <b>d4</b> | 7.007       | 0.160  | <b>X4</b> | 1.213       | 0.002 |            |       |        |

|              |           |         |        |           |         |        |            |         |        |
|--------------|-----------|---------|--------|-----------|---------|--------|------------|---------|--------|
| <b>Angle</b> | <b>a1</b> | 102.665 | -1.418 | <b>a4</b> | 115.635 | 1.200  | <b>a4'</b> | 115.656 | 1.221  |
|              | <b>a2</b> | 102.665 | -1.418 | <b>a5</b> | 153.664 | -0.817 | <b>a5'</b> | 154.045 | -0.436 |
|              | <b>a3</b> | 102.665 | -1.418 | <b>a6</b> | 160.424 | -0.524 | <b>a6'</b> | 158.942 | -2.006 |
|              |           |         |        | <b>a7</b> | 160.451 | 1.445  | <b>a7'</b> | 163.765 | 4.759  |

**Ne-C Distances:** Ne – C = 3.292 ; Ne – CH = 4.365 ; Ne – CH = 5.753 ; Ne – Center = 3.790

---



---

| <b>Endohedral complex of Ar with BIN (Ar@BIN)</b> |           |           |        |           |         |        |
|---------------------------------------------------|-----------|-----------|--------|-----------|---------|--------|
| <b>Arm1=Arm2 = Arm3</b>                           |           |           |        |           |         |        |
|                                                   |           | <b>DP</b> |        | <b>DP</b> |         |        |
| <b>C – C Distance</b>                             | <b>d1</b> | 2.870     | 0.250  | <b>X1</b> | 1.493   | 0.007  |
|                                                   | <b>d2</b> | 2.870     | 0.250  | <b>X2</b> | 1.208   | 0.002  |
|                                                   | <b>d3</b> | 2.870     | 0.250  | <b>X3</b> | 1.381   | 0.009  |
|                                                   | <b>d4</b> | 6.465     | -0.382 | <b>x4</b> | 1.214   | 0.003  |
| <b>Angle</b>                                      | <b>a1</b> | 106.462   | 2.379  | <b>a4</b> | 112.335 | -2.100 |
|                                                   | <b>a2</b> | 106.462   | 2.379  | <b>a5</b> | 160.140 | 5.659  |
|                                                   | <b>a3</b> | 106.462   | 2.379  | <b>a6</b> | 157.649 | -3.299 |
|                                                   |           |           |        | <b>a7</b> | 154.546 | -4.460 |

**Ar-C Distances:** Ar – CH = 3.232 ; Ar – C = 2.933

---



---

| <b>TS complex of Ar with BIN (Ar<sup>TS</sup>@BIN)</b> |           |             |        |           |                    |           |         |        |
|--------------------------------------------------------|-----------|-------------|--------|-----------|--------------------|-----------|---------|--------|
|                                                        |           | <b>Arm1</b> |        |           | <b>Arm2 = Arm3</b> |           |         |        |
|                                                        |           | <b>DP</b>   |        | <b>DP</b> |                    | <b>DP</b> |         |        |
| <b>Distance</b>                                        | <b>d1</b> | 2.793       | 0.173  | <b>X1</b> | 1.485              | -0.001    | 1.500   | 0.014  |
|                                                        | <b>d2</b> | 2.904       | 0.284  | <b>X2</b> | 1.205              | -0.001    | 1.210   | 0.004  |
|                                                        | <b>d3</b> | 2.904       | 0.284  | <b>X3</b> | 1.371              | -0.001    | 1.386   | 0.014  |
|                                                        | <b>d4</b> | 6.452       | -0.395 | <b>x4</b> | 1.210              | -0.001    | 1.216   | 0.005  |
| <b>Angle</b>                                           | <b>a1</b> | 103.254     | -0.829 | <b>a4</b> | 113.539            | -0.896    | 111.834 | -2.601 |
|                                                        | <b>a2</b> | 103.254     | -0.829 | <b>a5</b> | 154.470            | -0.011    | 160.812 | 6.331  |
|                                                        | <b>a3</b> | 112.564     | 8.481  | <b>a6</b> | 159.258            | -1.690    | 156.706 | -4.242 |
|                                                        |           |             |        | <b>a7</b> | 156.234            | -2.772    | 153.535 | -5.471 |

**Ar-C Distances:** Ar - CH = 3.339 ; Ar - C (Arm1) = 3.704 ; Ar - C (Arm2) = 2.813 ; Ar - Centre = 0.862

**Exohedral complex of Ar with BIN (Ar...BIN)**

|                 |           |         |        |           | Arm2 = Arm3 |        | Arm2 = Arm3 |         |        |
|-----------------|-----------|---------|--------|-----------|-------------|--------|-------------|---------|--------|
|                 |           |         | DP     |           |             | DP     |             | DP      |        |
| <b>Distance</b> | <b>d1</b> | 2.621   | 0.001  | <b>X1</b> | 1.486       | 0.000  | <b>X1'</b>  | 1.486   | 0.000  |
|                 | <b>d2</b> | 2.622   | 0.002  | <b>X2</b> | 1.206       | 0.000  | <b>X2'</b>  | 1.206   | 0.000  |
|                 | <b>d3</b> | 2.622   | 0.002  | <b>X3</b> | 1.371       | -0.001 | <b>X3'</b>  | 1.371   | -0.001 |
|                 | <b>d4</b> | 6.844   | -0.003 | <b>X4</b> | 1.211       | 0.000  |             |         |        |
| <b>Angle</b>    | <b>a1</b> | 104.072 | -0.011 | <b>a4</b> | 114.424     | -0.011 | <b>a4'</b>  | 114.417 | -0.018 |
|                 | <b>a2</b> | 104.072 | -0.011 | <b>a5</b> | 154.521     | 0.040  | <b>a5'</b>  | 154.534 | 0.053  |
|                 | <b>a3</b> | 104.132 | 0.049  | <b>a6</b> | 160.984     | 0.036  | <b>a6'</b>  | 160.954 | 0.006  |
|                 |           |         |        | <b>a7</b> | 158.882     | -0.124 | <b>a7'</b>  | 158.997 | -0.009 |

**Ar-C Distances:** Ar - C = 3.513; Ar - CH = 4.618; Ar - CH = 5.940 ; Ar - Centre = 4.073

\* All the distances are given in Ang and angle are in ° (degree)

## S6. Frontiers molecular orbitals, energy gap, dipole moment, point group of the studied complexes

**Table S7.** The calculated dipole moment, point group, and energy gap values between the HOMO and LUMO in various complexes of BTH and BIN cages.

| Systems                     | Dipole Moment<br>(Debye) | Point<br>Group | Energy gap (eV)      |                     |
|-----------------------------|--------------------------|----------------|----------------------|---------------------|
|                             |                          |                | $\alpha$ -spin state | $\beta$ -spin state |
| <b>Li@BTH</b>               | 2.799                    | $C_{2v}$       | 3.74                 | 5.44                |
| <b>Li...BTH</b>             | 3.763                    | $C_s$          | 4.37                 | 5.24                |
| <b>Li<sup>+</sup>@BTH</b>   | 0.000                    | $D_{3h}$       | 6.32                 | --                  |
| <b>Li<sup>+</sup>...BTH</b> | 5.270                    | $C_{2v}$       | 6.14                 | --                  |
| <b>Ne@BTH</b>               | 0.000                    | $D_{3h}$       | 6.34                 | --                  |
| <b>Ne...BTH</b>             | 0.028                    | $C_{2v}$       | 6.03                 | --                  |
| <b>Ar...BTH</b>             | 0.019                    | $C_{2v}$       | 6.03                 | --                  |
| <b>Li@BIN</b>               | 3.070                    | $C_{2v}$       | 3.39                 | 4.91                |
| <b>Li<sup>+</sup>@BIN</b>   | 0.543                    | $C_{3v}$       | 5.83                 | --                  |
| <b>Na@BIN</b>               | 3.940                    | $C_{2v}$       | 3.28                 | 5.11                |
| <b>Na<sup>+</sup>@BIN</b>   | 0.000                    | $D_{3h}$       | 6.08                 | --                  |
| <b>K@BIN</b>                | 4.128                    | $C_s$          | 3.05                 | 5.33                |
| <b>K...BIN</b>              | 6.483                    | $C_1$          | 3.51                 | 5.07                |
| <b>Ne@BIN</b>               | 0.000                    | $D_{3h}$       | 6.10                 | --                  |
| <b>Ne...BIN</b>             | 0.024                    | $C_s$          | 5.94                 | --                  |
| <b>Ar@BIN</b>               | 0.000                    | $D_{3h}$       | 6.30                 | --                  |
| <b>Ar...BIN</b>             | 0.024                    | $C_s$          | 5.94                 | --                  |

System

HOMO

LUMO

**Li@BTH**  
( $\alpha$ -spin state)

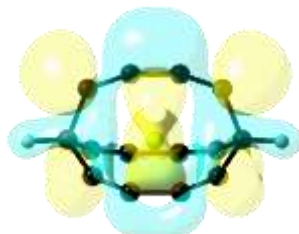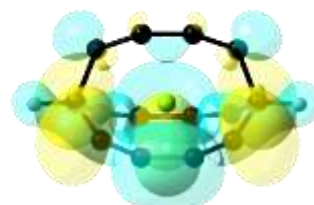

**Li@BTH**  
( $\beta$ -spin state)

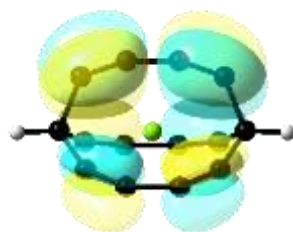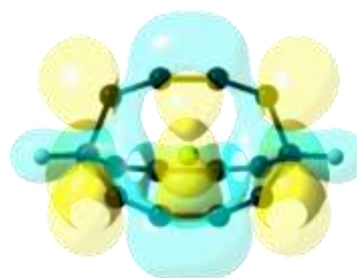

**Li...BTH**  
( $\alpha$ -spin state)

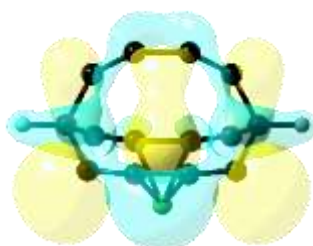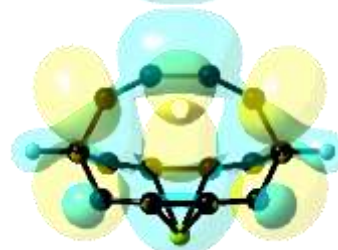

**Li...BTH**  
( $\beta$ -spin state)

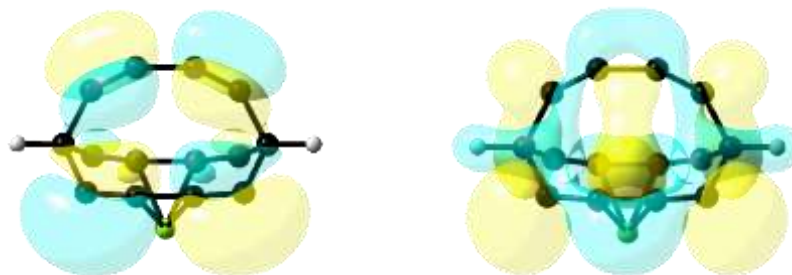

**Li<sup>+</sup>@BTH**

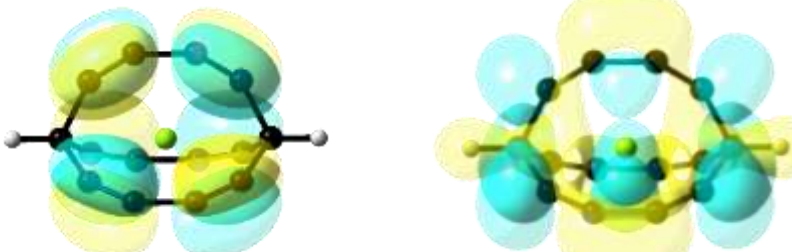

**Li<sup>+</sup>...BTH**

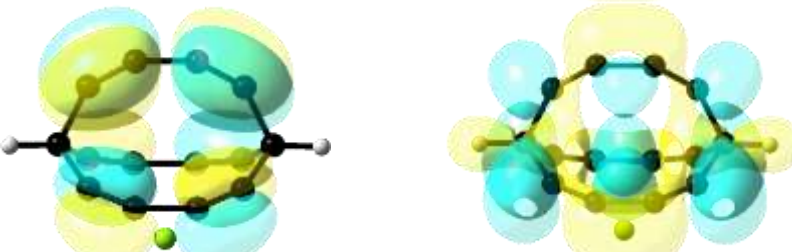

**Ne@BTH**

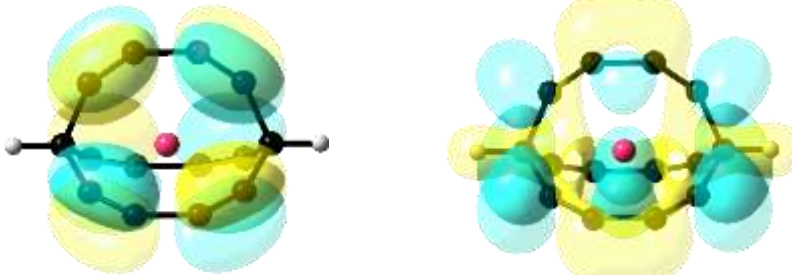

**Ne...BTH**

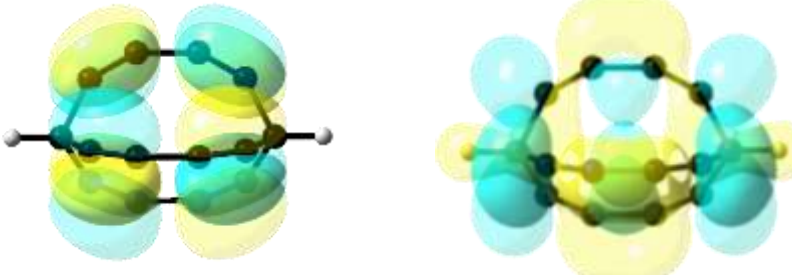

**Ar...BTH**

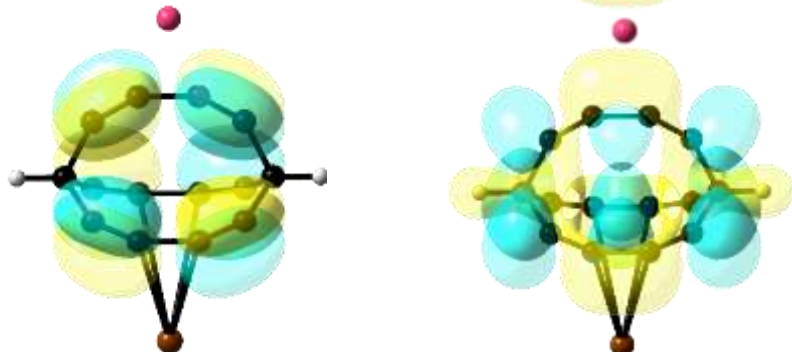

**Figure S6. Frontier's molecular orbitals of the complexes of BTH cage**

**Li@BIN**  
( $\alpha$ -spin state)

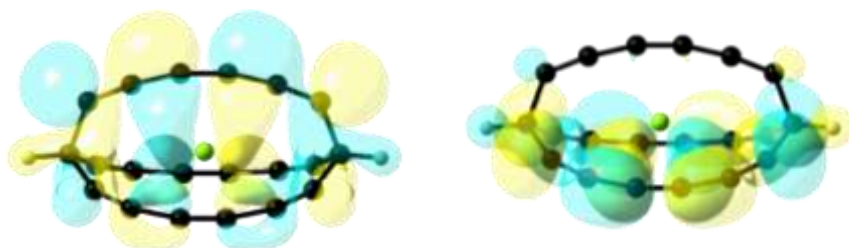

**Li@BIN**  
( $\beta$ -spin state)

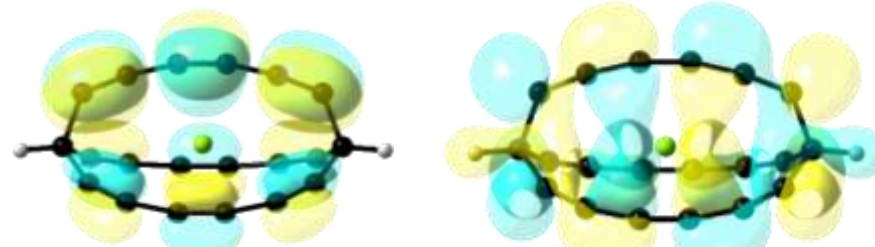

**Li<sup>+</sup>@BTH**

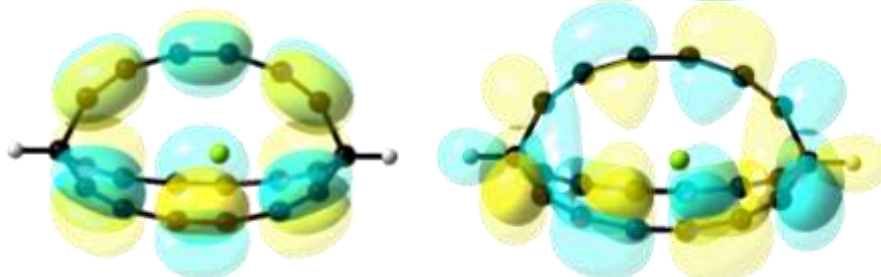

**Na@BIN**  
( $\alpha$ -spin state)

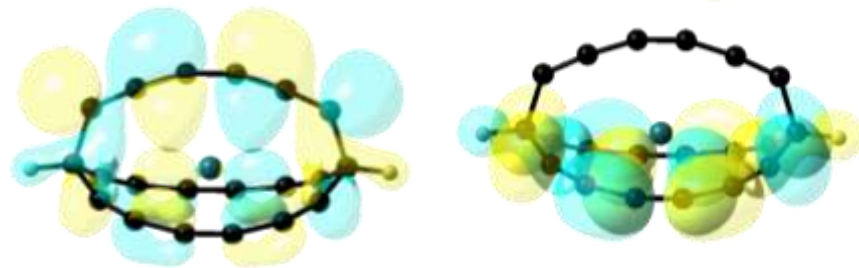

**Na@BIN**  
( $\beta$ -spin state)

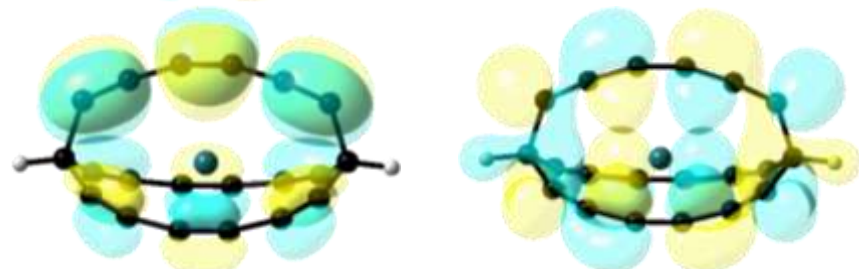

**Na<sup>+</sup>@BIN**

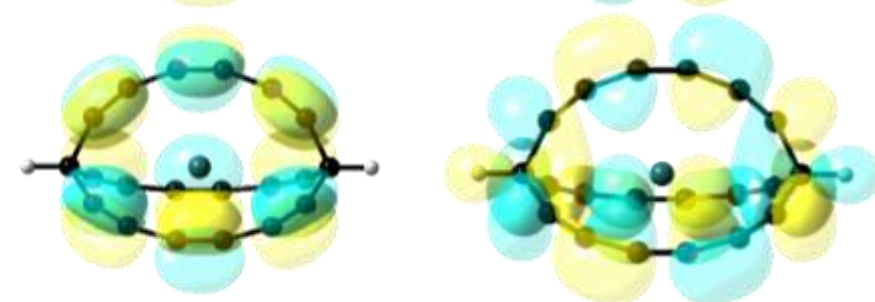



**K@BIN**  
( $\alpha$ -spin state)

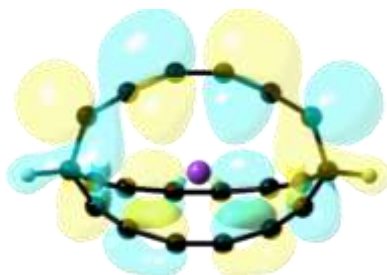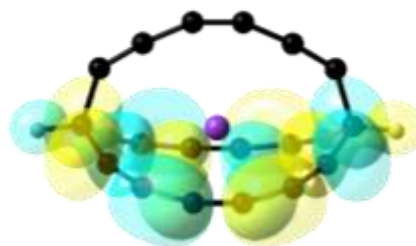

**K@BIN**  
( $\beta$ -spin state)

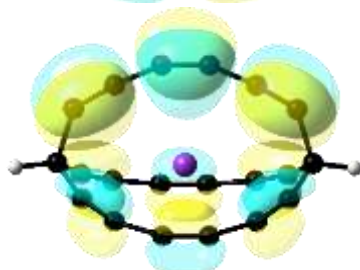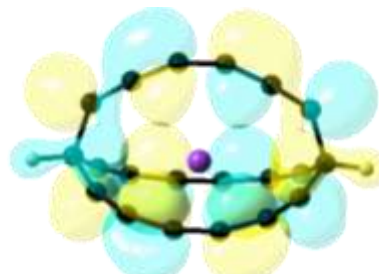

**K...BIN**  
( $\alpha$ -spin state)

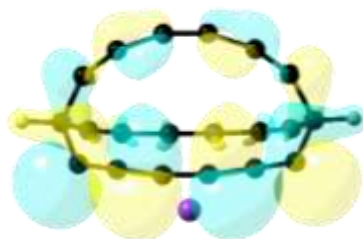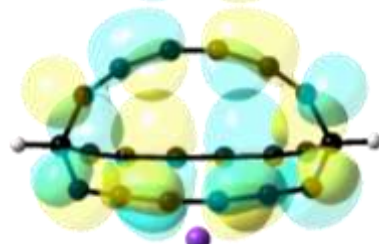

**K...BIN**  
( $\beta$ -spin state)

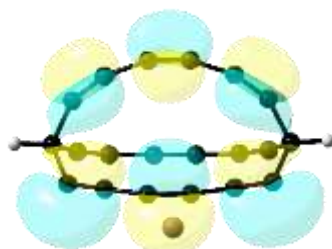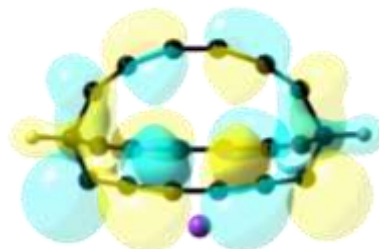

**Ne@BTH**

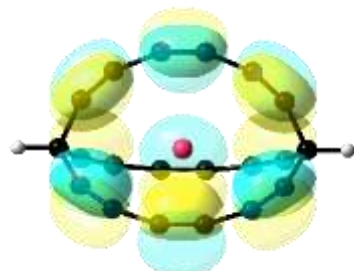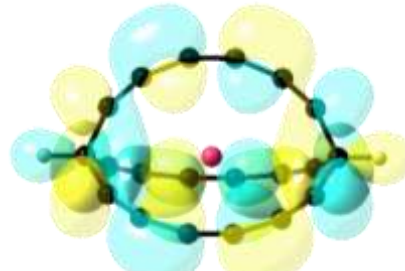

**Ne...BTH**

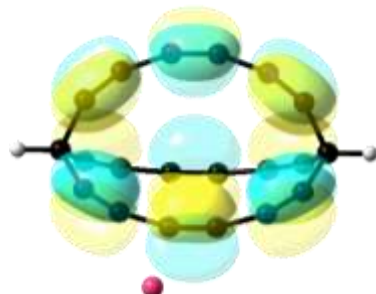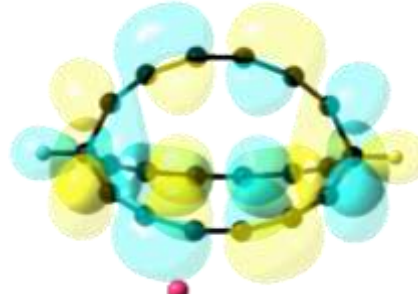



Ar@BTH

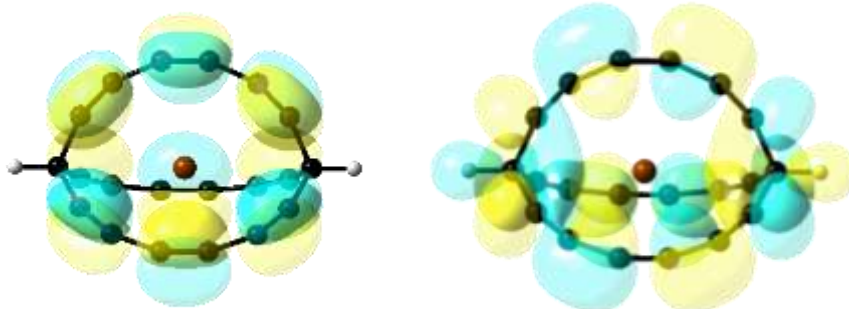

Ar...BTH

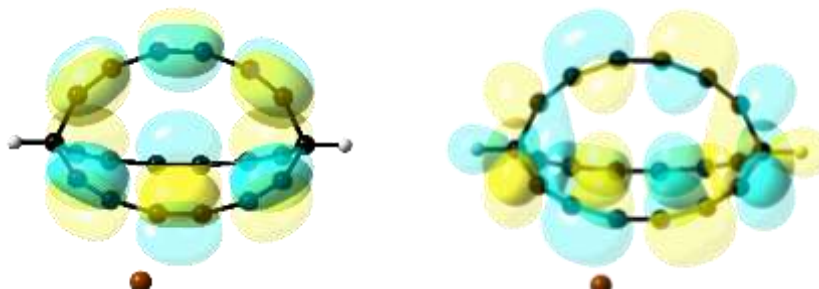

Figure S7. Frontier's molecular orbitals of the complexes of BIN cage

### S7. MESP and NPA Charges on complexes

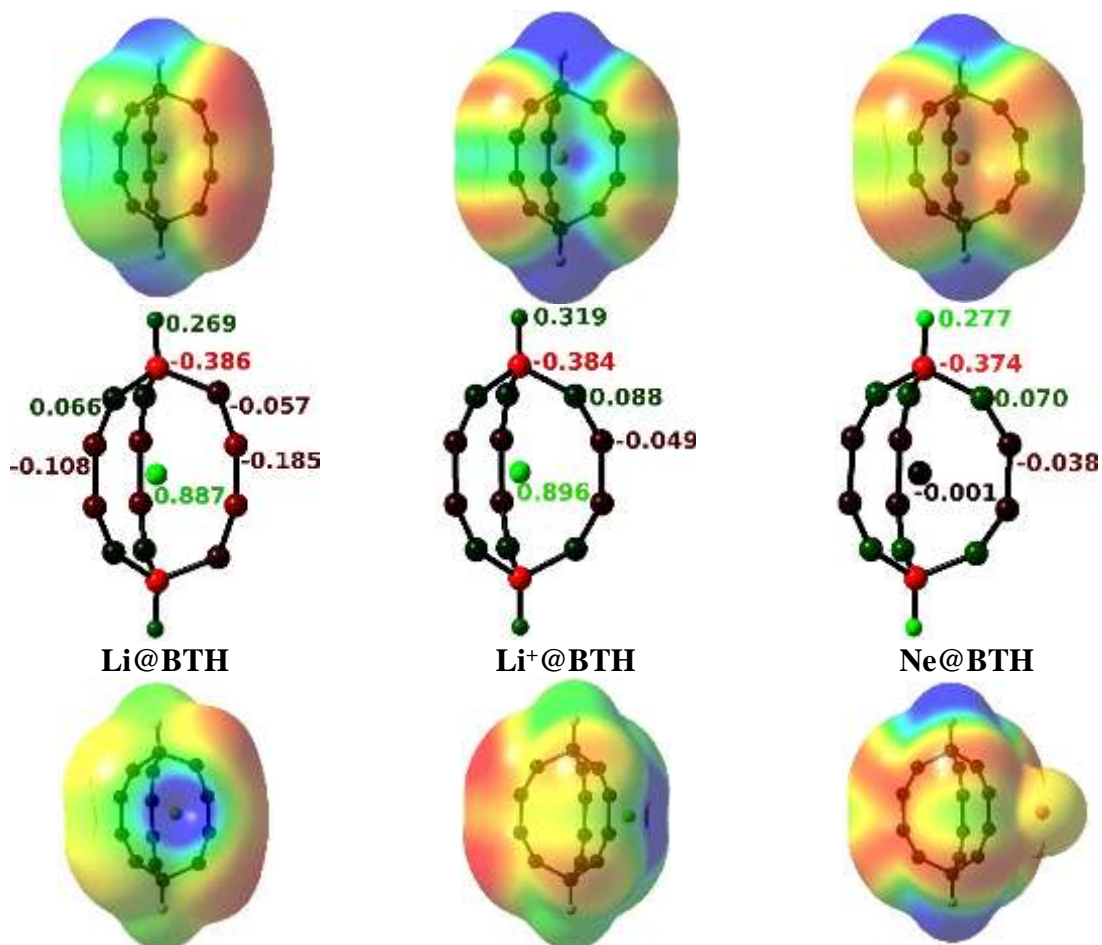

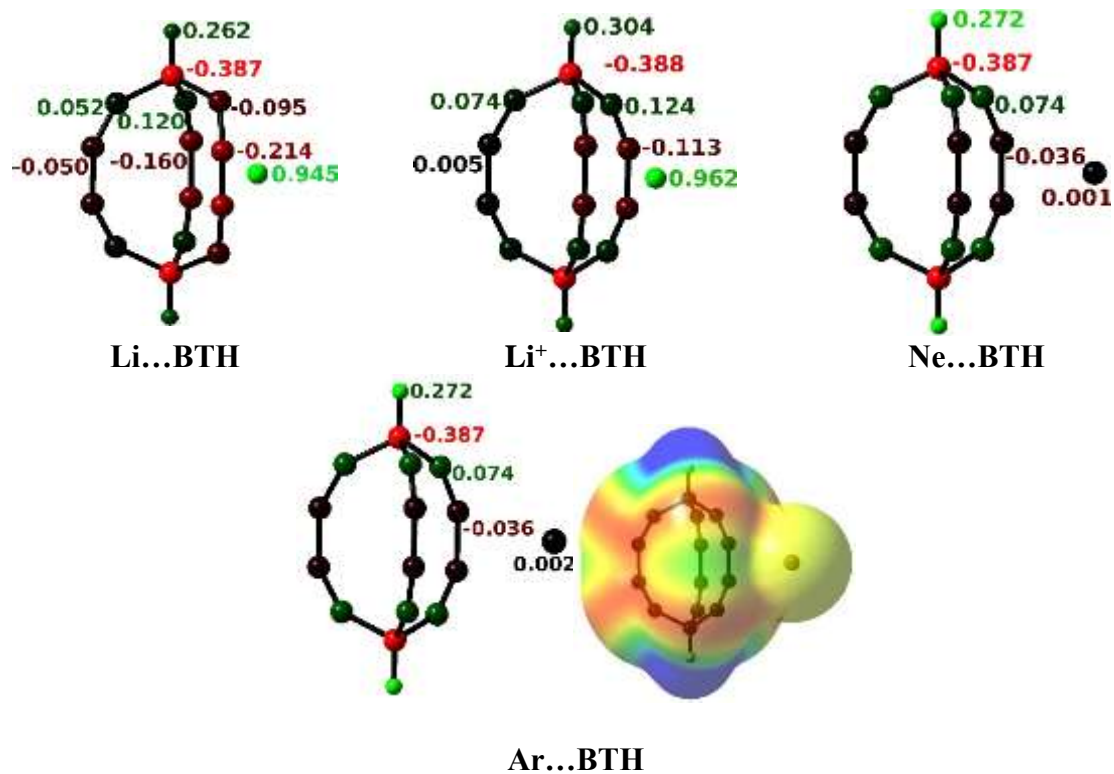

**Figure S8.** Molecular electrostatic potential and atomic charges on the BTH complexes.

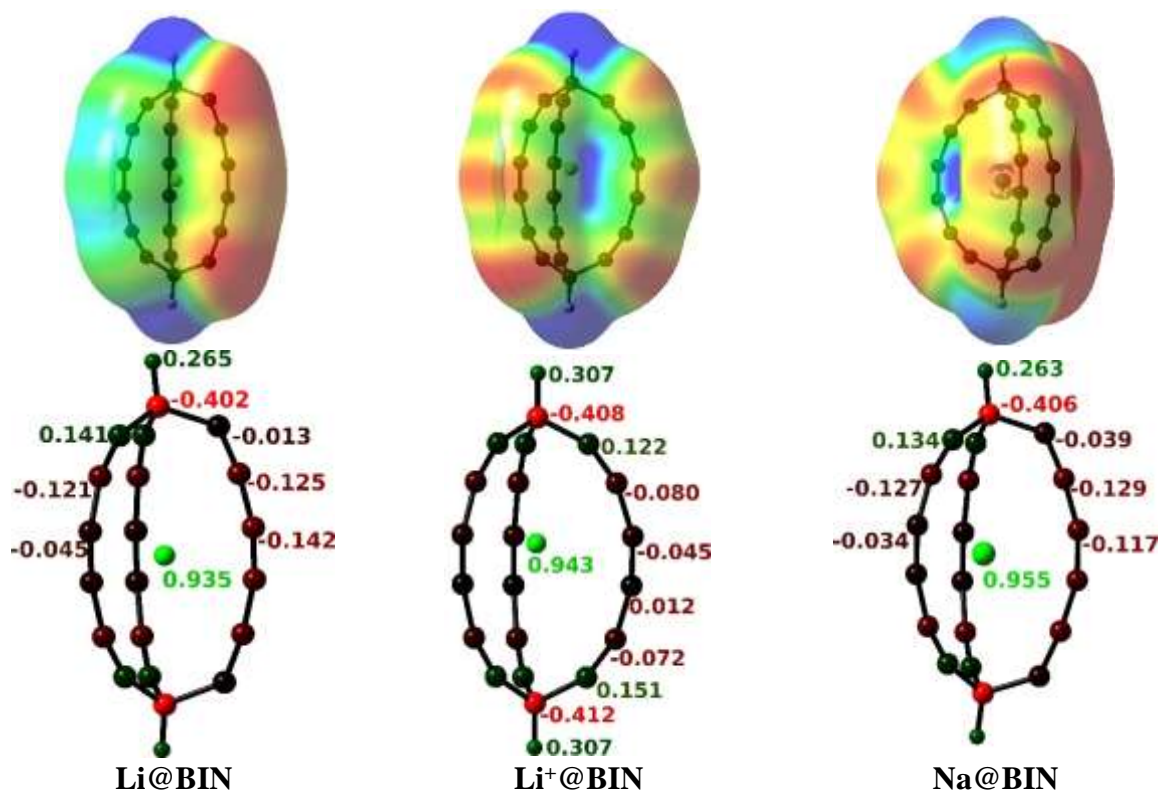

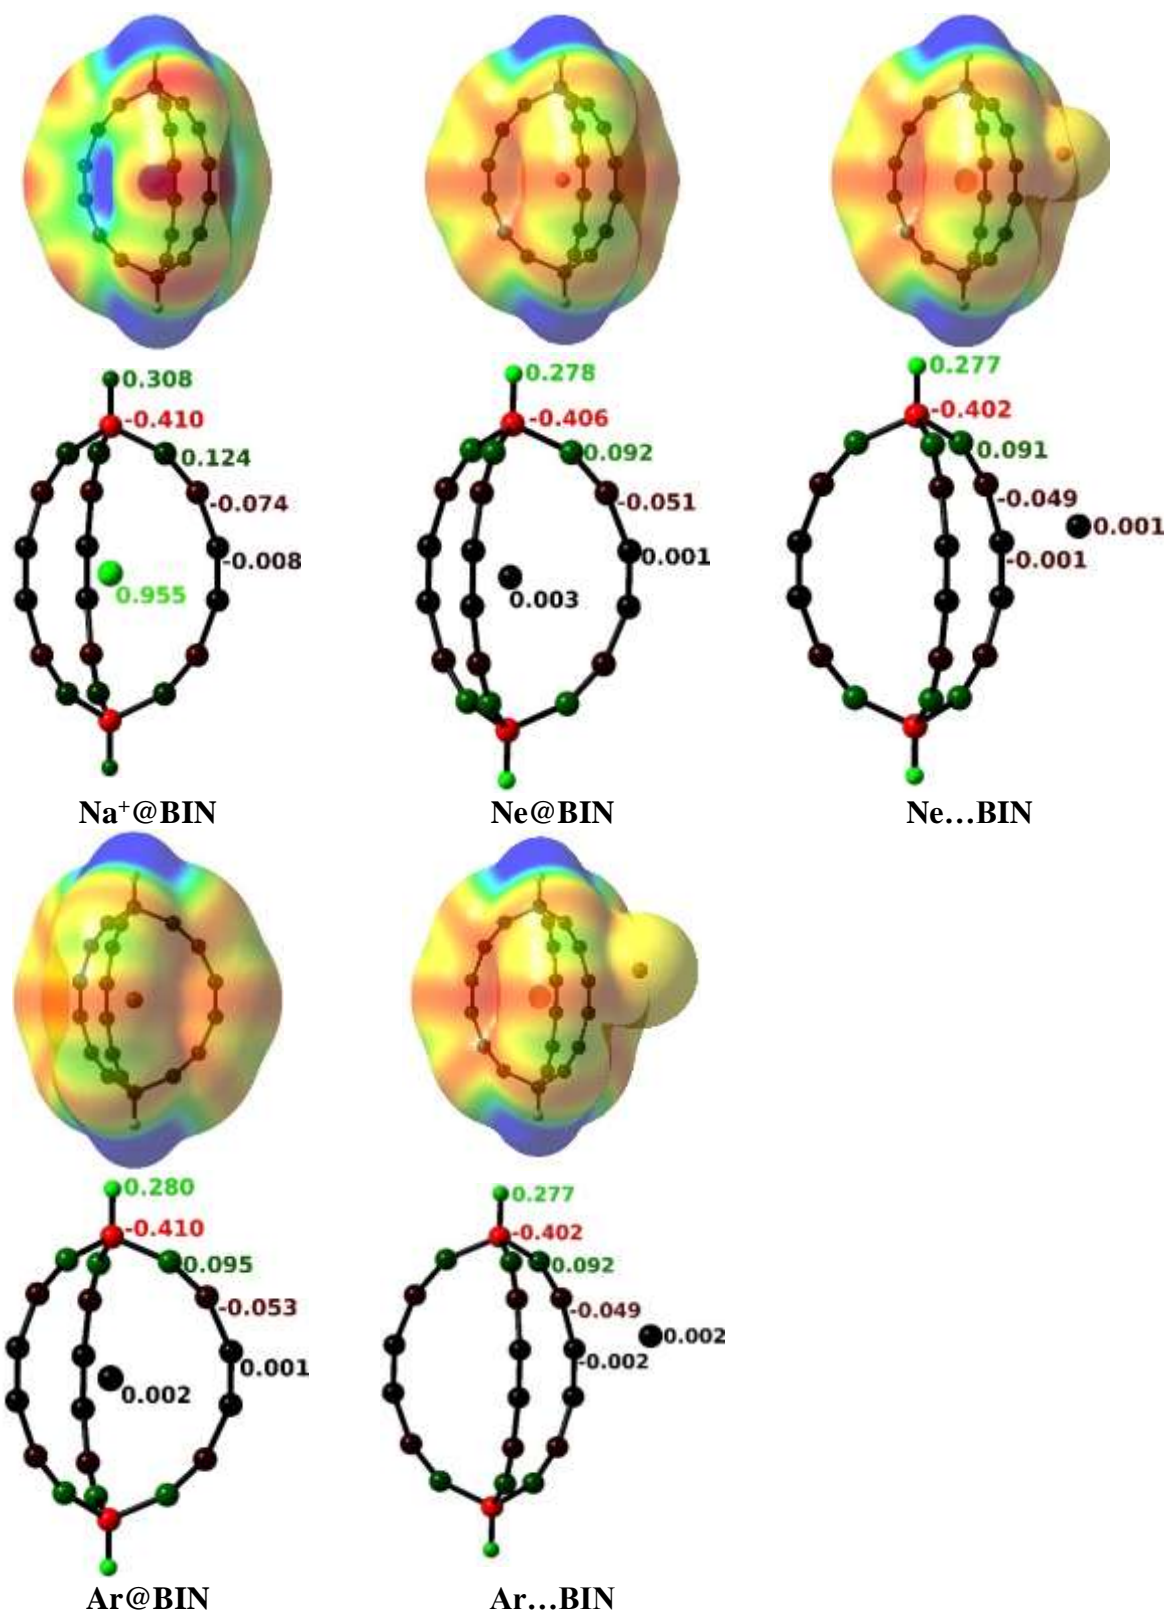

Figure S9. Molecular electrostatic potential and atomic charges on the BIN complexes.

### S8. IRC for the TS of the complex of Li with BTH cage

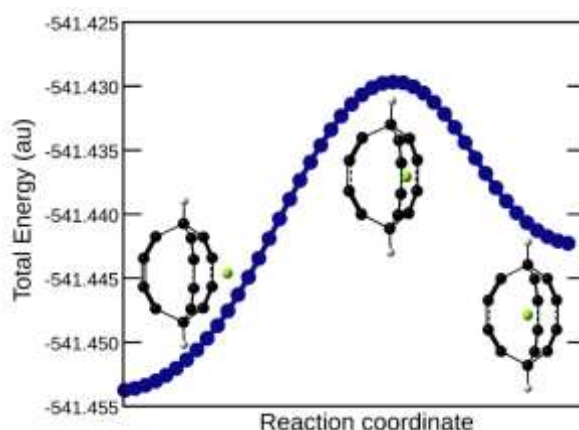

**Figure S10.** Intrinsic reaction coordinate (IRC) obtained from the TS of the complex of Li with the BTH cage.

### S9. Energy decomposition analysis (EDA)

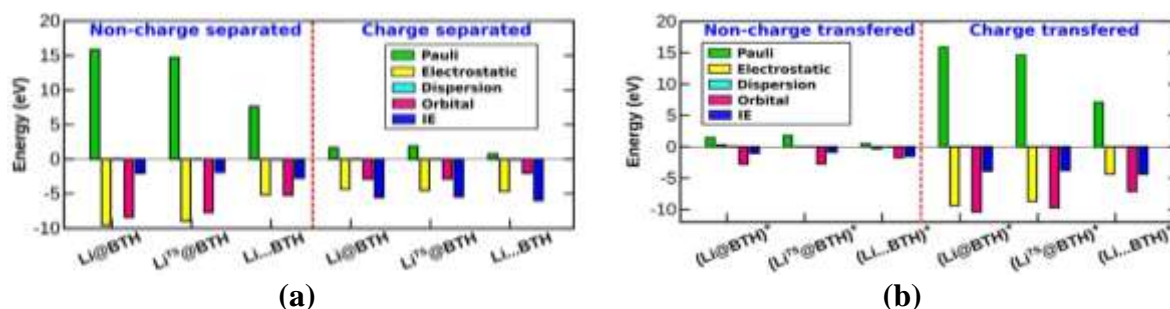

**Figure S11.** *IE* and its various components. (a) Endohedral, exohedral, and interlinking TS complexes of Li with BTH in non-charge separated and charge separated state. (b) Endohedral, exohedral, and interlinking TS complexes of  $\text{Li}^+$  with BTH in non-charge separated and charge separated state.

**Table S8.** *IE* values and its various energy components for the studied complexes

| Guest atom/ion       | Configuration | Pauli | Electrostatic | Steric | Dispersion | Orbital | <i>IE</i> |
|----------------------|---------------|-------|---------------|--------|------------|---------|-----------|
| <b>BTH complexes</b> |               |       |               |        |            |         |           |
| Li (Non-CS)          | Endo          | 15.88 | -9.52         | 6.36   | 0.04       | -8.41   | -2.02     |
|                      | Exo           | 7.62  | -5.13         | 2.49   | -0.03      | -5.19   | -2.73     |
|                      | TS            | 14.71 | -8.93         | 5.78   | 0.02       | -7.70   | -1.90     |
| Li (CS)              | Endo          | 1.67  | -4.34         | -2.68  | 0.04       | -2.89   | -5.53     |
|                      | Exo           | 0.76  | -4.68         | -3.92  | -0.03      | -2.02   | -5.96     |
|                      | TS            | 1.92  | -4.50         | -2.59  | 0.02       | -2.85   | -5.42     |
| $\text{Li}^+$        | Endo          | 1.46  | 0.26          | 1.72   | 0.04       | -2.76   | -1.00     |
|                      | Exo           | 0.52  | -0.30         | 0.23   | -0.03      | -1.73   | -1.53     |
|                      | TS            | 1.80  | 0.03          | 1.84   | 0.02       | -2.72   | -0.87     |
| Ne                   | Endo          | 6.79  | -2.42         | 4.37   | -0.08      | -0.52   | 3.77      |
|                      | Exo           | 0.06  | -0.03         | 0.03   | -0.05      | -0.01   | -0.02     |
|                      | TS            | 6.48  | -2.33         | 4.16   | -0.11      | -0.49   | 3.56      |
| Ar                   | Exo           | 0.14  | -0.06         | 0.08   | -0.12      | -0.02   | -0.05     |
| <b>BIN complexes</b> |               |       |               |        |            |         |           |



|                 |      |       |       |       |       |       |       |
|-----------------|------|-------|-------|-------|-------|-------|-------|
| Li (Non-CS)     | Endo | 8.61  | -5.57 | 3.04  | -0.07 | -5.64 | -2.67 |
| Li (CS)         | Endo | 0.48  | -4.25 | -3.77 | -0.07 | -2.07 | -5.90 |
| Li <sup>+</sup> | Endo | 0.25  | -0.22 | 0.03  | -0.07 | -1.78 | -1.82 |
| Na (Non-CS)     | Endo | 8.14  | -5.33 | 2.81  | -0.10 | -4.73 | -2.02 |
| Na (CS)         | Endo | 0.76  | -4.29 | -3.53 | -0.10 | -1.50 | -5.13 |
| Na <sup>+</sup> | Endo | 0.49  | -0.33 | 0.16  | -0.10 | -1.37 | -1.31 |
| K (Non-CS)      | Endo | 10.43 | -6.83 | 3.60  | -0.08 | -5.24 | -1.72 |
|                 | Exo  | 4.82  | -3.36 | 1.45  | -0.18 | -3.57 | -2.29 |
|                 | TS   | 9.16  | -6.05 | 3.11  | -0.18 | -4.76 | -1.83 |
| K (CS)          | Endo | 2.19  | -4.64 | -2.44 | -0.08 | -1.58 | -4.10 |
|                 | Exo  | 0.88  | -4.03 | -3.15 | -0.18 | -1.04 | -4.37 |
|                 | TS   | 2.12  | -4.63 | -2.51 | -0.18 | -1.48 | -4.16 |
| Ne              | Endo | 0.66  | -0.27 | 0.39  | -0.23 | -0.04 | 0.13  |
|                 | Exo  | 0.05  | -0.02 | 0.03  | -0.05 | 0.00  | -0.03 |
|                 | TS   | 0.82  | -0.33 | 0.49  | -0.18 | -0.04 | 0.27  |
| Ar              | Endo | 2.77  | -1.12 | 1.66  | -0.39 | -0.25 | 1.02  |
|                 | Exo  | 0.13  | -0.05 | 0.08  | -0.13 | -0.01 | -0.06 |
|                 | TS   | 2.82  | -1.12 | 1.70  | -0.32 | -0.26 | 1.12  |

\*All the energy values are given in eV

### S10. Photophysical properties of the complexes

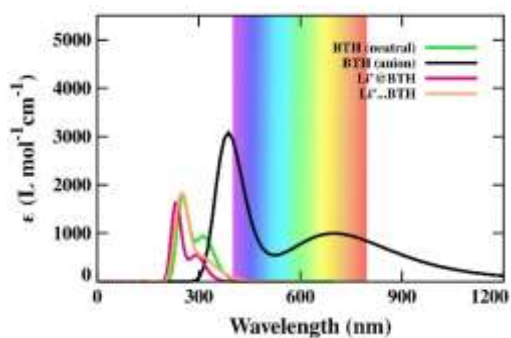

(a)

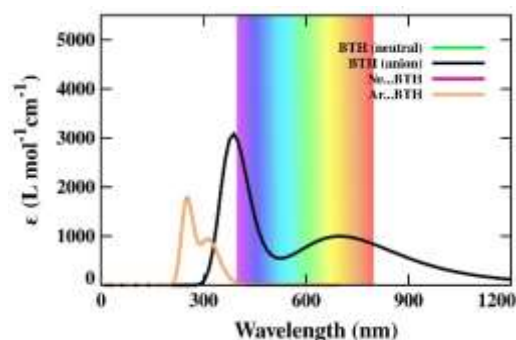

(b)

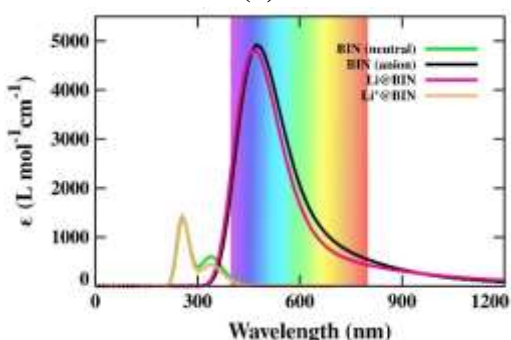

(c)

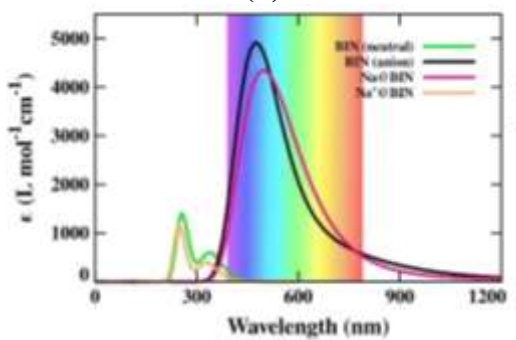

(d)

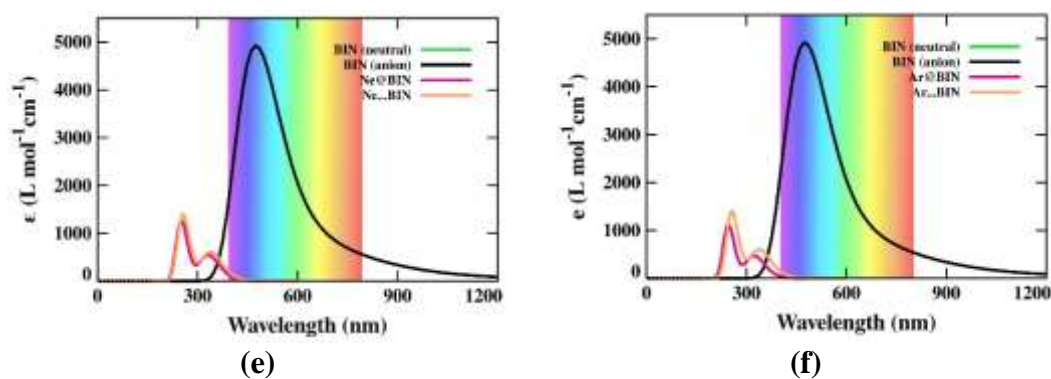

**Figure S12.** Optical absorption spectra of the complexes. (a) Complexes of Li with BTH, (b) Complexes of noble gases with BTH, (c) Complexes of Li and Li<sup>+</sup> with BIN, (d) Complexes of Na and Na<sup>+</sup> with BIN, (e) Complexes of Ne with BIN, and (f) Complexes of Ar with BIN.

**Table S9.** Spectral data for most important electronic excitations in the complexes.

| System                      | Oscillatory strength (f) | Excitation Wavelength ( $\lambda$ ) in nm | Absorption coefficient ( $\epsilon$ ) in Lmol <sup>-1</sup> cm <sup>-1</sup> |
|-----------------------------|--------------------------|-------------------------------------------|------------------------------------------------------------------------------|
| <b>Li@BTH</b>               | 0.01                     | 868.31                                    | 435.01                                                                       |
|                             | 0.04                     | 448.87                                    | 4124.24                                                                      |
|                             | 0.08                     | 424.93                                    | 4478.70                                                                      |
|                             | 0.03                     | 380.29                                    | 2902.78                                                                      |
| <b>Li...BTH</b>             | 0.01                     | 667.47                                    | 613.22                                                                       |
|                             | 0.01                     | 361.09                                    | 1609.70                                                                      |
|                             | 0.02                     | 354.44                                    | 1565.41                                                                      |
| <b>Li<sup>+</sup>@BTH</b>   | 0.02                     | 293.16                                    | 547.26                                                                       |
|                             | 0.05                     | 232.52                                    | 1640.50                                                                      |
| <b>Li<sup>+</sup>...BTH</b> | 0.02                     | 259.95                                    | 1618.18                                                                      |
|                             | 0.03                     | 243.51                                    | 1768.17                                                                      |
| <b>Ne...BTH</b>             | 0.03                     | 315.55                                    | 939.42                                                                       |
|                             | 0.05                     | 251.78                                    | 1786.35                                                                      |
| <b>Ar...BTH</b>             | 0.03                     | 315.63                                    | 931.13                                                                       |
|                             | 0.05                     | 251.85                                    | 1779.11                                                                      |
| <b>Li@BIN</b>               | 0.06                     | 498.14                                    | 4390.06                                                                      |
|                             | 0.02                     | 448.56                                    | 4657.02                                                                      |
|                             | 0.07                     | 444.13                                    | 4485.18                                                                      |
| <b>Li<sup>+</sup>@BIN</b>   | 0.01                     | 339.04                                    | 440.91                                                                       |
|                             | 0.04                     | 255.23                                    | 1431.92                                                                      |
| <b>Na@BIN</b>               | 0.06                     | 549.69                                    | 3801.14                                                                      |
|                             | 0.01                     | 486.10                                    | 4300.88                                                                      |
|                             | 0.07                     | 462.49                                    | 3965.18                                                                      |
| <b>Na<sup>+</sup>@BIN</b>   | 0.01                     | 329.92                                    | 389.25                                                                       |
|                             | 0.03                     | 248.32                                    | 1165.34                                                                      |
| <b>K@BIN</b>                | 0.07                     | 636.52                                    | 3059.29                                                                      |
|                             | 0.01                     | 553.99                                    | 3501.68                                                                      |
|                             | 0.07                     | 470.60                                    | 3489.31                                                                      |
|                             | 0.02                     | 435.44                                    | 2716.56                                                                      |

|                 |      |        |         |
|-----------------|------|--------|---------|
| <b>K...BIN</b>  | 0.01 | 680.73 | 629.62  |
|                 | 0.03 | 500.70 | 3252.67 |
|                 | 0.03 | 465.58 | 3675.67 |
|                 | 0.02 | 459.78 | 3669.57 |
|                 | 0.04 | 417.98 | 2780.99 |
| <b>Ne@BIN</b>   | 0.02 | 332.42 | 539.10  |
|                 | 0.04 | 251.28 | 1270.19 |
| <b>Ne...BIN</b> | 0.02 | 339.26 | 610.14  |
|                 | 0.04 | 256.52 | 1397.22 |
| <b>Ar@BIN</b>   | 0.01 | 323.80 | 470.63  |
|                 | 0.03 | 245.93 | 1131.76 |
| <b>Ar...BIN</b> | 0.02 | 339.31 | 606.79  |
|                 | 0.04 | 256.59 | 1393.79 |

### S11. AIMD Simulations

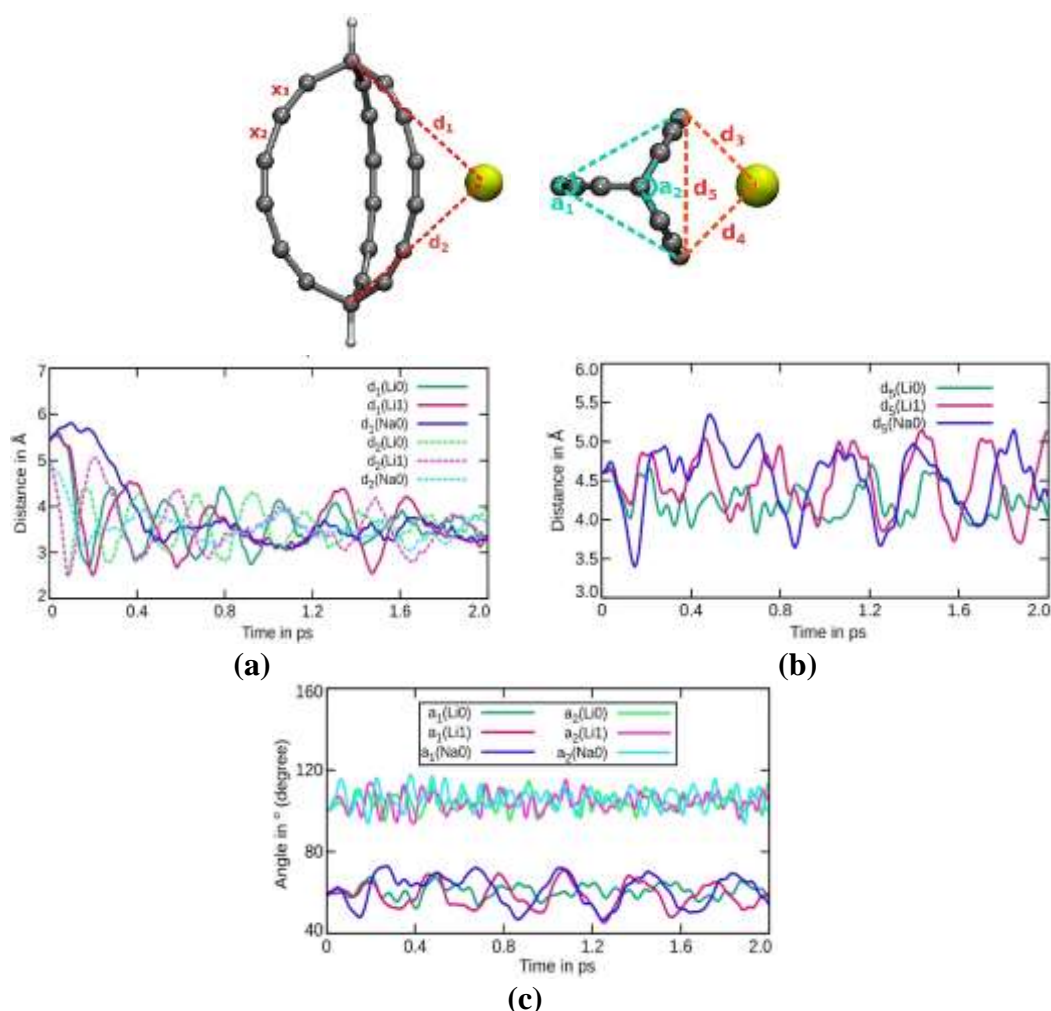

**Figure S13.** Variation in geometrical parameters during the AIMD simulations. (a) Variation in distance between metal and methanetriyl group ( $d_1$  and  $d_2$ ), (b) variation in distance between two arms of the cage ( $d_5$ ), and (c) variation in angle  $a_1$  and  $a_2$  (the notations used for geometrical parameters are illustrated in scheme).



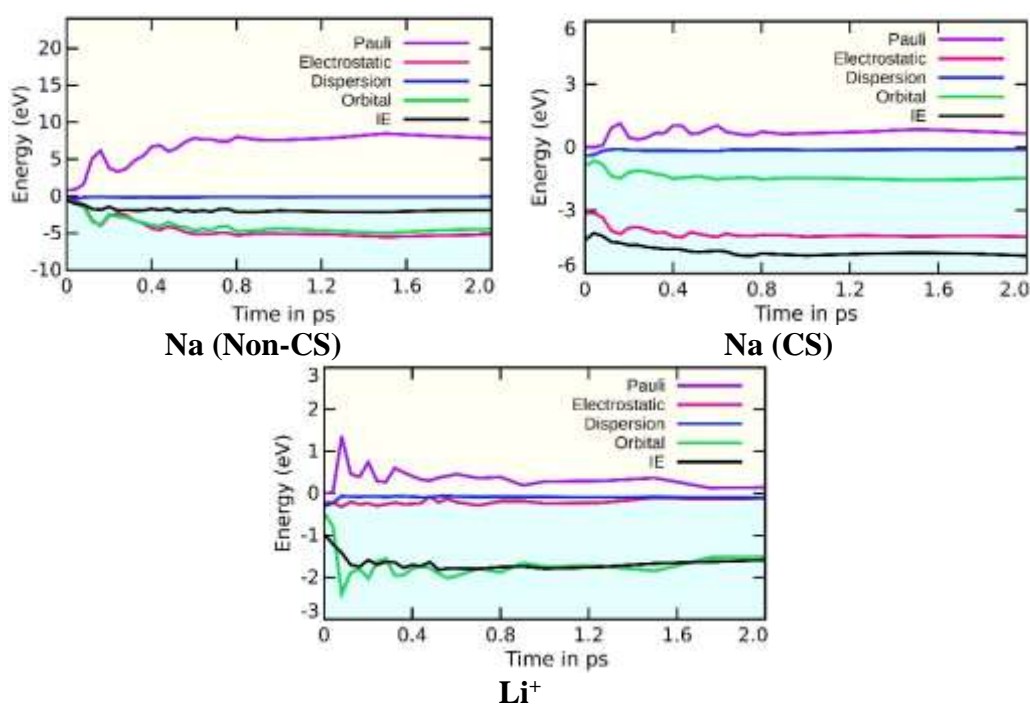

**Figure S14.** Variation in *IE* and its various energy components during the AIMD simulations complexes of Na and Li<sup>+</sup> with BIN cage.

## S12. CARTESIAN COORDINATES

### Neutral BTH

|   |             |             |             |
|---|-------------|-------------|-------------|
| C | 0.00000000  | 1.35173900  | 1.73658400  |
| C | 0.00000000  | 1.95788800  | 0.69299000  |
| C | 0.00000000  | 1.95788800  | -0.69299000 |
| C | 0.00000000  | 1.35173900  | -1.73658400 |
| C | -1.17064000 | -0.67586900 | 1.73658400  |
| C | 0.00000000  | 0.00000000  | 2.38563200  |
| C | 0.00000000  | 0.00000000  | -2.38563200 |
| C | -1.17064000 | -0.67586900 | -1.73658400 |
| C | -1.69558100 | -0.97894400 | -0.69299000 |
| C | -1.69558100 | -0.97894400 | 0.69299000  |
| C | 1.17064000  | -0.67586900 | 1.73658400  |
| C | 1.17064000  | -0.67586900 | -1.73658400 |
| C | 1.69558100  | -0.97894400 | -0.69299000 |
| C | 1.69558100  | -0.97894400 | 0.69299000  |
| H | 0.00000000  | 0.00000000  | 3.47186000  |
| H | 0.00000000  | 0.00000000  | -3.47186000 |

### Anionic BTH

|   |             |             |             |
|---|-------------|-------------|-------------|
| C | -1.16065200 | 1.74956300  | -0.67561600 |
| C | -1.69035300 | 0.69065200  | -0.93620300 |
| C | -1.69035300 | -0.69065200 | -0.93620300 |
| C | -1.16065200 | -1.74956300 | -0.67561600 |
| C | 0.00000000  | 1.88479300  | 1.46555800  |
| C | 0.00000000  | 2.40806800  | 0.00095200  |
| C | 0.00000000  | -2.40806800 | 0.00095200  |
| C | 0.00000000  | -1.88479300 | 1.46555800  |
| C | 0.00000000  | -0.66735800 | 1.76661300  |
| C | 0.00000000  | 0.66735800  | 1.76661300  |
| C | 1.16065200  | 1.74956300  | -0.67561600 |
| C | 1.16065200  | -1.74956300 | -0.67561600 |
| C | 1.69035300  | -0.69065200 | -0.93620300 |
| C | 1.69035300  | 0.69065200  | -0.93620300 |
| H | 0.00000000  | 3.49229300  | -0.05690700 |
| H | 0.00000000  | -3.49229300 | -0.05690700 |

### Cationic BTH

|   |             |             |             |
|---|-------------|-------------|-------------|
| C | 0.00000000  | 1.75473300  | 1.39583900  |
| C | 0.00000000  | 0.69197800  | 1.96714400  |
| C | 0.00000000  | -0.69197800 | 1.96714400  |
| C | 0.00000000  | -1.75473300 | 1.39583900  |
| C | 1.08504600  | 1.73159400  | -0.68301700 |
| C | 0.00000000  | 2.43034000  | 0.06509300  |
| C | 0.00000000  | -2.43034000 | 0.06509300  |
| C | 1.08504600  | -1.73159400 | -0.68301700 |
| C | 1.59240400  | -0.67847900 | -1.03405900 |
| C | 1.59240400  | 0.67847900  | -1.03405900 |
| C | -1.08504600 | 1.73159400  | -0.68301700 |
| C | -1.08504600 | -1.73159400 | -0.68301700 |
| C | -1.59240400 | -0.67847900 | -1.03405900 |
| C | -1.59240400 | 0.67847900  | -1.03405900 |
| H | 0.00000000  | 3.51643400  | 0.03645000  |
| H | 0.00000000  | -3.51643400 | 0.03645000  |

### Neutral BIN

|   |             |             |             |
|---|-------------|-------------|-------------|
| C | 0.00000000  | 2.61988300  | 0.60530700  |
| C | 0.00000000  | 2.61988300  | -0.60530700 |
| C | -1.84335000 | -1.06425800 | 1.88578500  |
| C | -1.17156600 | -0.67640400 | 2.80874600  |
| C | 0.00000000  | 2.12851700  | 1.88578500  |
| C | 0.00000000  | 0.00000000  | 3.42341200  |
| C | 0.00000000  | 1.35280800  | 2.80874600  |
| C | 0.00000000  | 2.12851700  | -1.88578500 |
| C | 0.00000000  | 1.35280800  | -2.80874600 |

|   |             |             |             |
|---|-------------|-------------|-------------|
| C | 0.00000000  | 0.00000000  | -3.42341200 |
| C | -1.17156600 | -0.67640400 | -2.80874600 |
| C | -1.84335000 | -1.06425800 | -1.88578500 |
| C | -2.26888500 | -1.30994200 | -0.60530700 |
| C | -2.26888500 | -1.30994200 | 0.60530700  |
| C | 1.84335000  | -1.06425800 | 1.88578500  |
| C | 2.26888500  | -1.30994200 | 0.60530700  |
| C | 1.17156600  | -0.67640400 | 2.80874600  |
| C | 2.26888500  | -1.30994200 | -0.60530700 |
| C | 1.84335000  | -1.06425800 | -1.88578500 |
| C | 1.17156600  | -0.67640400 | -2.80874600 |
| H | 0.00000000  | 0.00000000  | -4.51219700 |
| H | 0.00000000  | 0.00000000  | 4.51219700  |

### Cationic BIN

|   |             |             |             |
|---|-------------|-------------|-------------|
| C | 0.00000000  | 0.60512900  | 2.62802700  |
| C | 0.00000000  | -0.60512900 | 2.62802700  |
| C | 1.72988200  | 1.87603600  | -1.10345900 |
| C | 1.10058700  | 2.81884900  | -0.66248600 |
| C | 0.00000000  | 1.89002900  | 2.15114000  |
| C | 0.00000000  | 3.47870700  | 0.07591300  |
| C | 0.00000000  | 2.84396900  | 1.41405100  |
| C | 0.00000000  | -1.89002900 | 2.15114000  |
| C | 0.00000000  | -2.84396900 | 1.41405100  |
| C | 0.00000000  | -3.47870700 | 0.07591300  |
| C | 1.10058700  | -2.81884900 | -0.66248600 |
| C | 1.72988200  | -1.87603600 | -1.10345900 |
| C | 2.10956900  | -0.61139800 | -1.37279300 |
| C | 2.10956900  | 0.61139800  | -1.37279300 |
| C | -1.72988200 | 1.87603600  | -1.10345900 |
| C | -2.10956900 | 0.61139800  | -1.37279300 |
| C | -1.10058700 | 2.81884900  | -0.66248600 |
| C | -2.10956900 | -0.61139800 | -1.37279300 |
| C | -1.72988200 | -1.87603600 | -1.10345900 |
| C | -1.10058700 | -2.81884900 | -0.66248600 |
| H | 0.00000000  | -4.56694200 | 0.05008000  |
| H | 0.00000000  | 4.56694200  | 0.05008000  |

### Anionic BIN

|   |             |             |             |
|---|-------------|-------------|-------------|
| C | 2.25503500  | 0.60659400  | -1.17964800 |
| C | 2.25503500  | -0.60659400 | -1.17964800 |
| C | -1.84204800 | 1.89599800  | -0.97126800 |
| C | -1.15678000 | 2.83508000  | -0.63927300 |
| C | 1.84204800  | 1.89599800  | -0.97126800 |
| C | 0.00000000  | 3.50726600  | -0.00428100 |
| C | 1.15678000  | 2.83508000  | -0.63927300 |
| C | 1.84204800  | -1.89599800 | -0.97126800 |
| C | 1.15678000  | -2.83508000 | -0.63927300 |

|   |             |             |             |
|---|-------------|-------------|-------------|
| C | 0.00000000  | -3.50726600 | -0.00428100 |
| C | -1.15678000 | -2.83508000 | -0.63927300 |
| C | -1.84204800 | -1.89599800 | -0.97126800 |
| C | -2.25503500 | -0.60659400 | -1.17964800 |
| C | -2.25503500 | 0.60659400  | -1.17964800 |
| C | 0.00000000  | 1.91226200  | 1.91109000  |
| C | 0.00000000  | 0.62287700  | 2.22807400  |
| C | 0.00000000  | 3.08139200  | 1.46806300  |
| C | 0.00000000  | -0.62287700 | 2.22807400  |
| C | 0.00000000  | -1.91226200 | 1.91109000  |
| C | 0.00000000  | -3.08139200 | 1.46806300  |
| H | 0.00000000  | -4.58740000 | -0.13539500 |
| H | 0.00000000  | 4.58740000  | -0.13539500 |

### Endohedral complex of Li<sup>+</sup> with BTH (Li<sup>+</sup>@BTH)

|    |             |             |             |
|----|-------------|-------------|-------------|
| C  | 0.00000000  | 1.36004500  | 1.72391600  |
| C  | 0.00000000  | 2.00592400  | 0.69948700  |
| C  | 0.00000000  | 2.00592400  | -0.69948700 |
| C  | 0.00000000  | 1.36004500  | -1.72391600 |
| C  | -1.17783300 | -0.68002200 | 1.72391600  |
| C  | 0.00000000  | 0.00000000  | 2.38727500  |
| C  | 0.00000000  | 0.00000000  | -2.38727500 |
| C  | -1.17783300 | -0.68002200 | -1.72391600 |
| C  | -1.73718100 | -1.00296200 | -0.69948700 |
| C  | -1.73718100 | -1.00296200 | 0.69948700  |
| C  | 1.17783300  | -0.68002200 | 1.72391600  |
| C  | 1.17783300  | -0.68002200 | -1.72391600 |
| C  | 1.73718100  | -1.00296200 | -0.69948700 |
| C  | 1.73718100  | -1.00296200 | 0.69948700  |
| H  | 0.00000000  | 0.00000000  | 3.47448600  |
| H  | 0.00000000  | 0.00000000  | -3.47448600 |
| Li | 0.00000000  | 0.00000000  | 0.00000000  |

### TS complex of Li<sup>+</sup> with BTH (Li<sup>+</sup><sup>TS</sup>@BTH)

|   |             |             |             |
|---|-------------|-------------|-------------|
| C | 1.20707400  | 1.70162100  | 0.64892300  |
| C | 1.85215900  | 0.70480500  | 0.90330900  |
| C | 1.85215900  | -0.70480500 | 0.90330900  |
| C | 1.20707400  | -1.70162100 | 0.64892300  |
| C | -1.20707400 | 1.70162100  | 0.64892300  |
| C | 0.00000000  | 2.36872900  | 0.00481000  |
| C | 0.00000000  | -2.36872900 | 0.00481000  |
| C | -1.20707400 | -1.70162100 | 0.64892300  |
| C | -1.85215900 | -0.70480500 | 0.90330900  |
| C | -1.85215900 | 0.70480500  | 0.90330900  |
| C | 0.00000000  | 1.74100400  | -1.35538600 |
| C | 0.00000000  | -1.74100400 | -1.35538600 |
| C | 0.00000000  | -0.69303200 | -1.95459100 |

|    |            |             |             |
|----|------------|-------------|-------------|
| C  | 0.00000000 | 0.69303200  | -1.95459100 |
| H  | 0.00000000 | 3.45523200  | 0.04787500  |
| H  | 0.00000000 | -3.45523200 | 0.04787500  |
| Li | 0.00000000 | 0.00000000  | 0.77090100  |

**Exohedral complex of Li<sup>+</sup> with BTH (Li<sup>+</sup>...BTH)**

|    |             |             |             |
|----|-------------|-------------|-------------|
| C  | -1.16630900 | 1.71857100  | 0.60527000  |
| C  | -1.75177200 | 0.69702400  | 0.88349900  |
| C  | -1.75177200 | -0.69702400 | 0.88349900  |
| C  | -1.16630900 | -1.71857100 | 0.60527000  |
| C  | 0.00000000  | 1.74372600  | -1.41760200 |
| C  | 0.00000000  | 2.38863500  | -0.06970000 |
| C  | 0.00000000  | -2.38863500 | -0.06970000 |
| C  | 0.00000000  | -1.74372600 | -1.41760200 |
| C  | 0.00000000  | -0.69199500 | -2.00802900 |
| C  | 0.00000000  | 0.69199500  | -2.00802900 |
| C  | 1.16630900  | 1.71857100  | 0.60527000  |
| C  | 1.16630900  | -1.71857100 | 0.60527000  |
| C  | 1.75177200  | -0.69702400 | 0.88349900  |
| C  | 1.75177200  | 0.69702400  | 0.88349900  |
| H  | 0.00000000  | 3.47519500  | -0.04308800 |
| H  | 0.00000000  | -3.47519500 | -0.04308800 |
| Li | 0.00000000  | 0.00000000  | 2.09989700  |

**Endohedral complex of Li with BTH (Li@BTH)**

|    |             |             |             |
|----|-------------|-------------|-------------|
| C  | 1.16642400  | 1.72802900  | 0.68925800  |
| C  | 1.74711000  | 0.69573700  | 0.96666100  |
| C  | 1.74711000  | -0.69573700 | 0.96666100  |
| C  | 1.16642400  | -1.72802900 | 0.68925800  |
| C  | -1.16642400 | 1.72802900  | 0.68925800  |
| C  | 0.00000000  | 2.39314600  | 0.00749800  |
| C  | 0.00000000  | -2.39314600 | 0.00749800  |
| C  | -1.16642400 | -1.72802900 | 0.68925800  |
| C  | -1.74711000 | -0.69573700 | 0.96666100  |
| C  | -1.74711000 | 0.69573700  | 0.96666100  |
| C  | 0.00000000  | 1.84789300  | -1.45378300 |
| C  | 0.00000000  | -1.84789300 | -1.45378300 |
| C  | 0.00000000  | -0.67440600 | -1.88263500 |
| C  | 0.00000000  | 0.67440600  | -1.88263500 |
| H  | 0.00000000  | 3.47643100  | 0.05817300  |
| H  | 0.00000000  | -3.47643100 | 0.05817300  |
| Li | 0.00000000  | 0.00000000  | 0.02954400  |

**TS complex of Li with BTH (Li<sup>TS</sup>@BTH)**

|   |             |             |            |
|---|-------------|-------------|------------|
| C | -1.70896900 | -1.28616900 | 0.47637100 |
| C | -0.70977900 | -1.95749600 | 0.66691300 |
| C | 0.69513400  | -1.96280600 | 0.65299400 |

|    |             |             |             |
|----|-------------|-------------|-------------|
| C  | 1.69512900  | -1.29786400 | 0.44495800  |
| C  | -1.75111200 | 0.16619900  | -1.33200800 |
| C  | -2.37477100 | -0.00522000 | 0.01241500  |
| C  | 2.37425700  | -0.01765900 | 0.01005600  |
| C  | 1.75300000  | 0.18034100  | -1.33116900 |
| C  | 0.68874300  | 0.31875800  | -1.89717700 |
| C  | -0.68736100 | 0.31009700  | -1.89767400 |
| C  | -1.80858700 | 1.15914300  | 0.89629700  |
| C  | 1.82016700  | 1.13332400  | 0.92617100  |
| C  | 0.68668500  | 1.66076600  | 1.02138700  |
| C  | -0.67002200 | 1.66971500  | 1.00784900  |
| H  | -3.45843700 | -0.04443600 | 0.03245100  |
| H  | 3.45746700  | -0.06748100 | 0.03060900  |
| Li | -0.00470400 | -0.10495200 | 0.66421200  |

### Exohedral complex of Li with BTH (Li...BTH)

|    |             |             |             |
|----|-------------|-------------|-------------|
| C  | -0.17006400 | 1.41186200  | 1.85457600  |
| C  | 0.04163800  | 1.77670200  | 0.66803000  |
| C  | 0.04163800  | 1.77670200  | -0.66803000 |
| C  | -0.17006400 | 1.41186200  | -1.85457600 |
| C  | 1.27112000  | -0.57402200 | 1.74892900  |
| C  | 0.04727100  | -0.03212000 | 2.40001900  |
| C  | 0.04727100  | -0.03212000 | -2.40001900 |
| C  | 1.27112000  | -0.57402200 | -1.74892900 |
| C  | 1.82053100  | -0.77441600 | -0.68969700 |
| C  | 1.82053100  | -0.77441600 | 0.68969700  |
| C  | -1.02740700 | -0.81679400 | 1.71819500  |
| C  | -1.02740700 | -0.81679400 | -1.71819500 |
| C  | -1.54934300 | -1.20961600 | -0.69667600 |
| C  | -1.54934300 | -1.20961600 | 0.69667600  |
| H  | 0.02432800  | -0.07998800 | 3.48360200  |
| H  | 0.02432800  | -0.07998800 | -3.48360200 |
| Li | -1.75120000 | 0.92694900  | 0.00000000  |

### Endohedral complex of Ne with BTH (Ne@BTH)

|   |             |             |             |
|---|-------------|-------------|-------------|
| C | 0.00000000  | 1.42154700  | 1.70252100  |
| C | 0.00000000  | 2.12581800  | 0.70929000  |
| C | 0.00000000  | 2.12581800  | -0.70929000 |
| C | 0.00000000  | 1.42154700  | -1.70252100 |
| C | 1.23109600  | -0.71077300 | 1.70252100  |
| C | 0.00000000  | 0.00000000  | 2.30008800  |
| C | 0.00000000  | 0.00000000  | -2.30008800 |
| C | 1.23109600  | -0.71077300 | -1.70252100 |
| C | 1.84101300  | -1.06290900 | -0.70929000 |
| C | 1.84101300  | -1.06290900 | 0.70929000  |
| C | -1.23109600 | -0.71077300 | 1.70252100  |
| C | -1.23109600 | -0.71077300 | -1.70252100 |
| C | -1.84101300 | -1.06290900 | -0.70929000 |

|    |             |             |             |
|----|-------------|-------------|-------------|
| C  | -1.84101300 | -1.06290900 | 0.70929000  |
| H  | 0.00000000  | 0.00000000  | 3.38570400  |
| H  | 0.00000000  | 0.00000000  | -3.38570400 |
| Ne | 0.00000000  | 0.00000000  | 0.00000000  |

#### TS complex of Ne with BTH (Ne<sup>TS</sup>@BTH)

|    |             |             |             |
|----|-------------|-------------|-------------|
| C  | 0.00000000  | 1.71100900  | -1.34552400 |
| C  | 0.00000000  | 0.69335300  | -1.99625700 |
| C  | 0.00000000  | -0.69335300 | -1.99625700 |
| C  | 0.00000000  | -1.71100900 | -1.34552400 |
| C  | 1.32893500  | 1.69772000  | 0.61178600  |
| C  | 0.00000000  | 2.29834100  | 0.03252400  |
| C  | 0.00000000  | -2.29834100 | 0.03252400  |
| C  | 1.32893500  | -1.69772000 | 0.61178600  |
| C  | 2.03709700  | -0.71739100 | 0.78880700  |
| C  | 2.03709700  | 0.71739100  | 0.78880700  |
| C  | -1.32893500 | 1.69772000  | 0.61178600  |
| C  | -1.32893500 | -1.69772000 | 0.61178600  |
| C  | -2.03709700 | -0.71739100 | 0.78880700  |
| C  | -2.03709700 | 0.71739100  | 0.78880700  |
| H  | 0.00000000  | 3.38323000  | 0.06728300  |
| H  | 0.00000000  | -3.38323000 | 0.06728300  |
| Ne | 0.00000000  | 0.00000000  | 0.59622900  |

#### Exohedral complex of Ne with BTH (Ne...BTH)

|    |             |             |             |
|----|-------------|-------------|-------------|
| C  | 0.00000000  | 1.73628000  | -1.73188100 |
| C  | 0.00000000  | 0.69296900  | -2.33864600 |
| C  | 0.00000000  | -0.69296900 | -2.33864600 |
| C  | 0.00000000  | -1.73628000 | -1.73188100 |
| C  | 1.17056100  | 1.73665000  | 0.29528400  |
| C  | 0.00000000  | 2.38532900  | -0.38053300 |
| C  | 0.00000000  | -2.38532900 | -0.38053300 |
| C  | 1.17056100  | -1.73665000 | 0.29528400  |
| C  | 1.69625200  | -0.69290400 | 0.59688100  |
| C  | 1.69625200  | 0.69290400  | 0.59688100  |
| C  | -1.17056100 | 1.73665000  | 0.29528400  |
| C  | -1.17056100 | -1.73665000 | 0.29528400  |
| C  | -1.69625200 | -0.69290400 | 0.59688100  |
| C  | -1.69625200 | 0.69290400  | 0.59688100  |
| H  | 0.00000000  | 3.47171100  | -0.38078200 |
| H  | 0.00000000  | -3.47171100 | -0.38078200 |
| Ne | 0.00000000  | 0.00000000  | 3.27623300  |

#### Exohedral complex of Ar with BTH (Ar...BTH)

|   |             |             |             |
|---|-------------|-------------|-------------|
| C | -1.17043800 | 1.73660500  | -0.00959100 |
| C | -1.69680800 | 0.69295400  | 0.29132900  |
| C | -1.69680800 | -0.69295400 | 0.29132900  |

|    |             |             |             |
|----|-------------|-------------|-------------|
| C  | -1.17043800 | -1.73660500 | -0.00959100 |
| C  | 0.00000000  | 1.73666000  | -2.03674100 |
| C  | 0.00000000  | 2.38559300  | -0.68527300 |
| C  | 0.00000000  | -2.38559300 | -0.68527300 |
| C  | 0.00000000  | -1.73666000 | -2.03674100 |
| C  | 0.00000000  | -0.69295000 | -2.64290400 |
| C  | 0.00000000  | 0.69295000  | -2.64290400 |
| C  | 1.17043800  | 1.73660500  | -0.00959100 |
| C  | 1.17043800  | -1.73660500 | -0.00959100 |
| C  | 1.69680800  | -0.69295400 | 0.29132900  |
| C  | 1.69680800  | 0.69295400  | 0.29132900  |
| H  | 0.00000000  | 3.47195600  | -0.68523200 |
| H  | 0.00000000  | -3.47195600 | -0.68523200 |
| Ar | 0.00000000  | 0.00000000  | 3.27709800  |

#### Endohedral complex of Li<sup>+</sup> with BIN (Li<sup>+</sup>@BIN)

|    |             |             |             |
|----|-------------|-------------|-------------|
| C  | 0.00000000  | 2.51953200  | -0.59752400 |
| C  | 0.00000000  | 2.49632000  | 0.61553100  |
| C  | 1.80550700  | -1.04241000 | -1.90028400 |
| C  | 1.16164200  | -0.67067400 | -2.85089800 |
| C  | 0.00000000  | 2.08482000  | -1.90028400 |
| C  | 0.00000000  | 0.00000000  | -3.49456600 |
| C  | 0.00000000  | 1.34134900  | -2.85089800 |
| C  | 0.00000000  | 2.08776800  | 1.92475700  |
| C  | 0.00000000  | 1.33940300  | 2.86932000  |
| C  | 0.00000000  | 0.00000000  | 3.51265200  |
| C  | 1.15995700  | -0.66970200 | 2.86932000  |
| C  | 1.80806000  | -1.04388400 | 1.92475700  |
| C  | 2.16187700  | -1.24816000 | 0.61553100  |
| C  | 2.18197900  | -1.25976600 | -0.59752400 |
| C  | -1.80550700 | -1.04241000 | -1.90028400 |
| C  | -2.18197900 | -1.25976600 | -0.59752400 |
| C  | -1.16164200 | -0.67067400 | -2.85089800 |
| C  | -2.16187700 | -1.24816000 | 0.61553100  |
| C  | -1.80806000 | -1.04388400 | 1.92475700  |
| C  | -1.15995700 | -0.66970200 | 2.86932000  |
| H  | 0.00000000  | 0.00000000  | 4.60145200  |
| H  | 0.00000000  | 0.00000000  | -4.58324100 |
| Li | 0.00000000  | 0.00000000  | -0.40766400 |

#### Endohedral complex of Li with BIN (Li@BIN)

|   |             |             |             |
|---|-------------|-------------|-------------|
| C | 2.13289700  | 0.60814700  | -1.14736400 |
| C | 2.13289700  | -0.60814700 | -1.14736400 |
| C | -1.78783500 | 1.92141700  | -0.97115300 |
| C | -1.14721500 | 2.89451400  | -0.64770500 |
| C | 1.78783500  | 1.92141700  | -0.97115300 |
| C | 0.00000000  | 3.57763500  | -0.00332300 |
| C | 1.14721500  | 2.89451400  | -0.64770500 |



|    |             |             |             |
|----|-------------|-------------|-------------|
| C  | 1.78783500  | -1.92141700 | -0.97115300 |
| C  | 1.14721500  | -2.89451400 | -0.64770500 |
| C  | 0.00000000  | -3.57763500 | -0.00332300 |
| C  | -1.14721500 | -2.89451400 | -0.64770500 |
| C  | -1.78783500 | -1.92141700 | -0.97115300 |
| C  | -2.13289700 | -0.60814700 | -1.14736400 |
| C  | -2.13289700 | 0.60814700  | -1.14736400 |
| C  | 0.00000000  | 1.92304300  | 1.89794200  |
| C  | 0.00000000  | 0.62335600  | 2.20516900  |
| C  | 0.00000000  | 3.07272100  | 1.43143600  |
| C  | 0.00000000  | -0.62335600 | 2.20516900  |
| C  | 0.00000000  | -1.92304300 | 1.89794200  |
| C  | 0.00000000  | -3.07272100 | 1.43143600  |
| H  | 0.00000000  | -4.65987700 | -0.09909900 |
| H  | 0.00000000  | 4.65987700  | -0.09909900 |
| Li | 0.00000000  | 0.00000000  | 0.07095000  |

#### Endohedral complex of Na<sup>+</sup> with BIN (Na<sup>+</sup>@BIN)

|    |             |             |             |
|----|-------------|-------------|-------------|
| C  | 0.00000000  | 2.65846200  | 0.60633400  |
| C  | 0.00000000  | 2.65846200  | -0.60633400 |
| C  | -1.86507800 | -1.07680300 | 1.88507600  |
| C  | -1.16845500 | -0.67460800 | 2.78397300  |
| C  | 0.00000000  | 2.15360600  | 1.88507600  |
| C  | 0.00000000  | 0.00000000  | 3.40929700  |
| C  | 0.00000000  | 1.34921600  | 2.78397300  |
| C  | 0.00000000  | 2.15360600  | -1.88507600 |
| C  | 0.00000000  | 1.34921600  | -2.78397300 |
| C  | 0.00000000  | 0.00000000  | -3.40929700 |
| C  | -1.16845500 | -0.67460800 | -2.78397300 |
| C  | -1.86507800 | -1.07680300 | -1.88507600 |
| C  | -2.30229600 | -1.32923100 | -0.60633400 |
| C  | -2.30229600 | -1.32923100 | 0.60633400  |
| C  | 1.86507800  | -1.07680300 | 1.88507600  |
| C  | 2.30229600  | -1.32923100 | 0.60633400  |
| C  | 1.16845500  | -0.67460800 | 2.78397300  |
| C  | 2.30229600  | -1.32923100 | -0.60633400 |
| C  | 1.86507800  | -1.07680300 | -1.88507600 |
| C  | 1.16845500  | -0.67460800 | -2.78397300 |
| H  | 0.00000000  | 0.00000000  | -4.49895500 |
| H  | 0.00000000  | 0.00000000  | 4.49895500  |
| Na | 0.00000000  | 0.00000000  | 0.00000000  |

#### Endohedral complex of Na with BIN (Na@BIN)

|   |             |             |             |
|---|-------------|-------------|-------------|
| C | 0.00000000  | 0.62406700  | -2.37844600 |
| C | 0.00000000  | -0.62406700 | -2.37844600 |
| C | -1.88065600 | 1.88686000  | 0.99422800  |
| C | -1.15428200 | 2.78852300  | 0.64351800  |

|    |             |             |             |
|----|-------------|-------------|-------------|
| C  | 0.00000000  | 1.89520300  | -1.97544300 |
| C  | 0.00000000  | 3.46510200  | 0.00865600  |
| C  | 0.00000000  | 3.02232600  | -1.44883500 |
| C  | 0.00000000  | -1.89520300 | -1.97544300 |
| C  | 0.00000000  | -3.02232600 | -1.44883500 |
| C  | 0.00000000  | -3.46510200 | 0.00865600  |
| C  | -1.15428200 | -2.78852300 | 0.64351800  |
| C  | -1.88065600 | -1.88686000 | 0.99422800  |
| C  | -2.32596100 | -0.60777300 | 1.21431000  |
| C  | -2.32596100 | 0.60777300  | 1.21431000  |
| C  | 1.88065600  | 1.88686000  | 0.99422800  |
| C  | 2.32596100  | 0.60777300  | 1.21431000  |
| C  | 1.15428200  | 2.78852300  | 0.64351800  |
| C  | 2.32596100  | -0.60777300 | 1.21431000  |
| C  | 1.88065600  | -1.88686000 | 0.99422800  |
| C  | 1.15428200  | -2.78852300 | 0.64351800  |
| H  | 0.00000000  | -4.54514400 | 0.13926300  |
| H  | 0.00000000  | 4.54514400  | 0.13926300  |
| Na | 0.00000000  | 0.00000000  | 0.07281400  |

#### Endohedral complex of K with BIN (K@BIN)

|   |             |             |             |
|---|-------------|-------------|-------------|
| C | 2.45020700  | -1.33656300 | 0.60850000  |
| C | 2.45020700  | -1.33656300 | -0.60850000 |
| C | 0.04464400  | 2.08503500  | 1.84896700  |
| C | 0.02886400  | 1.44202400  | 2.91144200  |
| C | 1.94430800  | -1.08027300 | 1.86186700  |
| C | -0.00165700 | -0.01797300 | 3.33879900  |
| C | 1.15798700  | -0.68785100 | 2.69606200  |
| C | 1.94430800  | -1.08027300 | -1.86186700 |
| C | 1.15798700  | -0.68785100 | -2.69606200 |
| C | -0.00165700 | -0.01797300 | -3.33879900 |
| C | 0.02886400  | 1.44202400  | -2.91144200 |
| C | 0.04464400  | 2.08503500  | -1.84896700 |
| C | 0.05951700  | 2.62635900  | -0.62431700 |
| C | 0.05951700  | 2.62635900  | 0.62431700  |
| C | -1.98660600 | -1.00735100 | 1.86179400  |
| C | -2.50180700 | -1.24611300 | 0.60851300  |
| C | -1.18659000 | -0.64157400 | 2.69511300  |
| C | -2.50180700 | -1.24611300 | -0.60851300 |
| C | -1.98660600 | -1.00735100 | -1.86179400 |
| C | -1.18659000 | -0.64157400 | -2.69511300 |
| H | -0.00482200 | -0.14124600 | -4.42139400 |
| H | -0.00482200 | -0.14124600 | 4.42139400  |
| K | -0.00509300 | -0.07084900 | 0.00000000  |

**TS complex of K with BIN (K<sup>TS</sup>@BIN)**

|   |             |             |             |
|---|-------------|-------------|-------------|
| C | 0.62479500  | -2.31614500 | -1.33289300 |
| C | -0.62479100 | -2.31614300 | -1.33290500 |
| C | 1.85800800  | 2.26757600  | -0.27852900 |
| C | 2.66276600  | 1.36148600  | -0.24723700 |
| C | 1.84011900  | -1.77023600 | -1.16161000 |
| C | 3.31867800  | 0.03757400  | -0.02501000 |
| C | 2.78096900  | -0.96274200 | -1.03741300 |
| C | -1.84011100 | -1.77023300 | -1.16161300 |
| C | -2.78096000 | -0.96274200 | -1.03741800 |
| C | -3.31867800 | 0.03757200  | -0.02501900 |
| C | -2.66276500 | 1.36148400  | -0.24724100 |
| C | -1.85800700 | 2.26757200  | -0.27853700 |
| C | -0.60853200 | 2.86077500  | -0.27726000 |
| C | 0.60853000  | 2.86077700  | -0.27725900 |
| C | 1.87531800  | -0.67360500 | 2.03048200  |
| C | 0.60745400  | -0.87004300 | 2.49324600  |
| C | 2.78688300  | -0.36106000 | 1.29801600  |
| C | -0.60746800 | -0.87004300 | 2.49324700  |
| C | -1.87533100 | -0.67360400 | 2.03048200  |
| C | -2.78689100 | -0.36105800 | 1.29801100  |
| H | -4.40434300 | 0.11573000  | -0.06593300 |
| H | 4.40434400  | 0.11573200  | -0.06591500 |
| K | 0.00000500  | 0.25713500  | -0.91628300 |

**Exohedral complex of K with BIN (K...BIN)**

|   |             |             |             |
|---|-------------|-------------|-------------|
| C | 0.62433600  | 0.09969600  | 2.29806000  |
| C | -0.62451200 | 0.10029000  | 2.29789100  |
| C | 1.88051200  | -1.20773900 | -1.69435200 |
| C | 2.75972100  | -0.67512500 | -1.05763500 |
| C | 1.87748300  | -0.00031100 | 1.86484800  |
| C | 3.44290600  | 0.22966500  | -0.10481000 |
| C | 2.96214300  | -0.19850300 | 1.27809500  |
| C | -1.87767800 | 0.00090200  | 1.86465100  |
| C | -2.96230100 | -0.19724900 | 1.27769800  |
| C | -3.44235200 | 0.23127100  | -0.10544100 |
| C | -2.75944700 | -0.67396300 | -1.05805000 |
| C | -1.88032900 | -1.20695000 | -1.69459200 |
| C | -0.60719400 | -1.51552200 | -2.10717300 |
| C | 0.60725700  | -1.51570100 | -2.10698700 |
| C | 1.88814900  | 2.29204600  | -0.53145400 |
| C | 0.60723900  | 2.76544800  | -0.61117200 |
| C | 2.82614500  | 1.54042500  | -0.40831100 |
| C | -0.60526600 | 2.76562800  | -0.61130100 |
| C | -1.88643400 | 2.29288400  | -0.53183900 |
| C | -2.82472900 | 1.54161800  | -0.40882700 |
| H | -4.52580000 | 0.21039500  | -0.20332300 |

|   |             |             |             |
|---|-------------|-------------|-------------|
| H | 4.52636900  | 0.20813800  | -0.20238700 |
| K | -0.00181400 | -2.12796800 | 0.70052200  |

### Endohedral complex of Ne with BIN (Ne@BIN)

|    |             |             |             |
|----|-------------|-------------|-------------|
| C  | 0.00000000  | 2.73905700  | 0.60558700  |
| C  | 0.00000000  | 2.73905700  | -0.60558700 |
| C  | -1.89731700 | -1.09541700 | 1.86516400  |
| C  | -1.17853600 | -0.68042800 | 2.73988900  |
| C  | 0.00000000  | 2.19083300  | 1.86516400  |
| C  | 0.00000000  | 0.00000000  | 3.33768800  |
| C  | 0.00000000  | 1.36085600  | 2.73988900  |
| C  | 0.00000000  | 2.19083300  | -1.86516400 |
| C  | 0.00000000  | 1.36085600  | -2.73988900 |
| C  | 0.00000000  | 0.00000000  | -3.33768800 |
| C  | -1.17853600 | -0.68042800 | -2.73988900 |
| C  | -1.89731700 | -1.09541700 | -1.86516400 |
| C  | -2.37209300 | -1.36952900 | -0.60558700 |
| C  | -2.37209300 | -1.36952900 | 0.60558700  |
| C  | 1.89731700  | -1.09541700 | 1.86516400  |
| C  | 2.37209300  | -1.36952900 | 0.60558700  |
| C  | 1.17853600  | -0.68042800 | 2.73988900  |
| C  | 2.37209300  | -1.36952900 | -0.60558700 |
| C  | 1.89731700  | -1.09541700 | -1.86516400 |
| C  | 1.17853600  | -0.68042800 | -2.73988900 |
| H  | 0.00000000  | 0.00000000  | -4.42745900 |
| H  | 0.00000000  | 0.00000000  | 4.42745900  |
| Ne | 0.00000000  | 0.00000000  | 0.00000000  |

### TS complex of Ne with BIN (Ne<sup>TS</sup>@BIN)

|   |             |             |             |
|---|-------------|-------------|-------------|
| C | 0.00000000  | 0.60518800  | -2.72704600 |
| C | 0.00000000  | -0.60518800 | -2.72704600 |
| C | -2.00333700 | 1.85065500  | 0.93250100  |
| C | -1.20106200 | 2.69688000  | 0.62266600  |
| C | 0.00000000  | 1.87113100  | -2.20112800 |
| C | 0.00000000  | 3.30975700  | -0.00597500 |
| C | 0.00000000  | 2.75869400  | -1.38564700 |
| C | 0.00000000  | -1.87113100 | -2.20112800 |
| C | 0.00000000  | -2.75869400 | -1.38564700 |
| C | 0.00000000  | -3.30975700 | -0.00597500 |
| C | -1.20106200 | -2.69688000 | 0.62266600  |
| C | -2.00333700 | -1.85065500 | 0.93250100  |
| C | -2.55777700 | -0.60593700 | 1.12804500  |
| C | -2.55777700 | 0.60593700  | 1.12804500  |
| C | 2.00333700  | 1.85065500  | 0.93250100  |
| C | 2.55777700  | 0.60593700  | 1.12804500  |
| C | 1.20106200  | 2.69688000  | 0.62266600  |
| C | 2.55777700  | -0.60593700 | 1.12804500  |

|    |            |             |            |
|----|------------|-------------|------------|
| C  | 2.00333700 | -1.85065500 | 0.93250100 |
| C  | 1.20106200 | -2.69688000 | 0.62266600 |
| H  | 0.00000000 | -4.39888900 | 0.03679300 |
| H  | 0.00000000 | 4.39888900  | 0.03679300 |
| Ne | 0.00000000 | 0.00000000  | 1.13668900 |

#### Exohedral complex of Ne with BIN (Ne...BIN)

|    |             |             |             |
|----|-------------|-------------|-------------|
| C  | 0.95225300  | -0.65754800 | 2.27279800  |
| C  | 1.11417600  | 0.54216800  | 2.27148300  |
| C  | -2.62153700 | -1.47795500 | 0.00000000  |
| C  | -1.97285600 | -2.49421900 | 0.00000000  |
| C  | 0.54214100  | -1.89436100 | 1.84519000  |
| C  | -0.71166300 | -3.27956800 | 0.00000000  |
| C  | 0.03893900  | -2.75847900 | 1.17162300  |
| C  | 1.03909200  | 1.84321900  | 1.84438600  |
| C  | 0.77625300  | 2.80862500  | 1.17170700  |
| C  | 0.18590100  | 3.50589500  | 0.00000000  |
| C  | -1.23553500 | 3.07332500  | 0.00000000  |
| C  | -2.12548000 | 2.25994800  | 0.00000000  |
| C  | -2.78151400 | 1.05564300  | 0.00000000  |
| C  | -2.94144000 | -0.14434200 | 0.00000000  |
| C  | 0.54214100  | -1.89436100 | -1.84519000 |
| C  | 0.95225300  | -0.65754800 | -2.27279800 |
| C  | 0.03893900  | -2.75847900 | -1.17162300 |
| C  | 1.11417600  | 0.54216800  | -2.27148300 |
| C  | 1.03909200  | 1.84321900  | -1.84438600 |
| C  | 0.77625300  | 2.80862500  | -1.17170700 |
| H  | 0.32784300  | 4.58544500  | 0.00000000  |
| H  | -0.85317200 | -4.35916200 | 0.00000000  |
| Ne | 3.21958300  | -1.38221300 | 0.00000000  |

#### Endohedral complex of Ar with BIN (Ar@BIN)

|   |             |             |             |
|---|-------------|-------------|-------------|
| C | 0.00000000  | 2.86970900  | 0.60690200  |
| C | 0.00000000  | 2.86970900  | -0.60690200 |
| C | -1.97137200 | -1.13817200 | 1.85351300  |
| C | -1.19632500 | -0.69069800 | 2.66485900  |
| C | 0.00000000  | 2.27634400  | 1.85351300  |
| C | 0.00000000  | 0.00000000  | 3.23240100  |
| C | 0.00000000  | 1.38139700  | 2.66485900  |
| C | 0.00000000  | 2.27634400  | -1.85351300 |
| C | 0.00000000  | 1.38139700  | -2.66485900 |
| C | 0.00000000  | 0.00000000  | -3.23240100 |
| C | -1.19632500 | -0.69069800 | -2.66485900 |
| C | -1.97137200 | -1.13817200 | -1.85351300 |
| C | -2.48524100 | -1.43485500 | -0.60690200 |
| C | -2.48524100 | -1.43485500 | 0.60690200  |

|    |            |             |             |
|----|------------|-------------|-------------|
| C  | 1.97137200 | -1.13817200 | 1.85351300  |
| C  | 2.48524100 | -1.43485500 | 0.60690200  |
| C  | 1.19632500 | -0.69069800 | 2.66485900  |
| C  | 2.48524100 | -1.43485500 | -0.60690200 |
| C  | 1.97137200 | -1.13817200 | -1.85351300 |
| C  | 1.19632500 | -0.69069800 | -2.66485900 |
| H  | 0.00000000 | 0.00000000  | -4.32343400 |
| H  | 0.00000000 | 0.00000000  | 4.32343400  |
| Ar | 0.00000000 | 0.00000000  | 0.00000000  |

**TS complex of Ar with BIN (Ar<sup>TS</sup>@BIN)**

|    |             |             |             |
|----|-------------|-------------|-------------|
| C  | 0.00000000  | 0.60519900  | -2.75425200 |
| C  | 0.00000000  | -0.60519900 | -2.75425200 |
| C  | -2.14326600 | 1.84865400  | 0.84680500  |
| C  | -1.24757500 | 2.63069400  | 0.62086700  |
| C  | 0.00000000  | 1.85951900  | -2.20193200 |
| C  | 0.00000000  | 3.22599400  | 0.03876800  |
| C  | 0.00000000  | 2.71895900  | -1.35715100 |
| C  | 0.00000000  | -1.85951900 | -2.20193200 |
| C  | 0.00000000  | -2.71895900 | -1.35715100 |
| C  | 0.00000000  | -3.22599400 | 0.03876800  |
| C  | -1.24757500 | -2.63069400 | 0.62086700  |
| C  | -2.14326600 | -1.84865400 | 0.84680500  |
| C  | -2.74511400 | -0.60806200 | 0.98540100  |
| C  | -2.74511400 | 0.60806200  | 0.98540100  |
| C  | 2.14326600  | 1.84865400  | 0.84680500  |
| C  | 2.74511400  | 0.60806200  | 0.98540100  |
| C  | 1.24757500  | 2.63069400  | 0.62086700  |
| C  | 2.74511400  | -0.60806200 | 0.98540100  |
| C  | 2.14326600  | -1.84865400 | 0.84680500  |
| C  | 1.24757500  | -2.63069400 | 0.62086700  |
| H  | 0.00000000  | -4.31461000 | 0.10681200  |
| H  | 0.00000000  | 4.31461000  | 0.10681200  |
| Ar | 0.00000000  | 0.00000000  | 0.90041200  |

**Exohedral complex of Ar with BIN (Ar<sup>TS</sup>@BIN)**

|   |             |             |            |
|---|-------------|-------------|------------|
| C | 0.57391500  | -0.72770800 | 2.27706900 |
| C | 1.00804600  | 0.40238100  | 2.27517900 |
| C | -3.08565400 | -0.69685700 | 0.00000000 |
| C | -2.69129800 | -1.83619500 | 0.00000000 |
| C | -0.10948100 | -1.83636500 | 1.84737400 |
| C | -1.64729400 | -2.89340700 | 0.00000000 |
| C | -0.79659200 | -2.56099800 | 1.17179600 |
| C | 1.23982900  | 1.68408100  | 1.84609200 |
| C | 1.20977500  | 2.68319300  | 1.17193200 |
| C | 0.79887800  | 3.49875500  | 0.00000000 |
| C | -0.68434100 | 3.40963700  | 0.00000000 |

|    |             |             |             |
|----|-------------|-------------|-------------|
| C  | -1.73881600 | 2.82510000  | 0.00000000  |
| C  | -2.65598200 | 1.80546800  | 0.00000000  |
| C  | -3.08791200 | 0.67453800  | 0.00000000  |
| C  | -0.10948100 | -1.83636500 | -1.84737400 |
| C  | 0.57391500  | -0.72770800 | -2.27706900 |
| C  | -0.79659200 | -2.56099800 | -1.17179600 |
| C  | 1.00804600  | 0.40238100  | -2.27517900 |
| C  | 1.23982900  | 1.68408100  | -1.84609200 |
| C  | 1.20977500  | 2.68319300  | -1.17193200 |
| H  | 1.18903000  | 4.51529200  | 0.00000000  |
| H  | -2.03616900 | -3.91041100 | 0.00000000  |
| Ar | 2.89420900  | -2.05900700 | 0.00000000  |
